# Supplementary material
Source: HighWire-hosted journal article supplement (https://www.jneurosci.org/content/suppl/2005/01/26/25.4.950)

## Supplemental Figure 1: Illustrative diagrams of the kinetic reactions in the model

A, Glutamate binds to mGluRs, resulting in Gq activation.

Glu released at the synaptic cleft binds to mGluRs. Activated mGluRs in turn binds to Gq to promote the exchange of GDP to GTP of Gq. An activated Gq splits into an  $\alpha$  subunit (Gq $\alpha$ ) and a  $\beta\gamma$  complex (Gq $\beta\gamma$ ). As far as we know, Fay *et al.* (1991) Biochemistry 30:5066-5075 is an only paper of measuring G-protein-coupled-receptor kinetics entirely, and they reported very small Gq turnover.

B, Activated PLC $\beta$  by Gq produces IP $_3$ .

Gq $\alpha$  binds to PLC $\beta$  to enhance the PLC $\beta$  efficiency of IP $_3$  production. PLC $\beta$  has GTPase activating protein (GAP) activity, which promotes ATPase efficiency of Gq by thousands times.

C, IP $_3$  degradation by IP $_3$  3-kinase (IP3K) and IP $_3$  5-phosphatase (IP5P).

IP $_3$  degradation is extensively reviewed in a simulation study (Dunplot and Erneux (1997) Cell Calcium 22:321-331). For a review for the metabolism of inositol phosphates, see Irvine and Schell (2001) Nat Rev Mol Cell Biol 2:327-338.

D, IP $_3$ R kinetics.

We developed a novel kinetic model of IP $_3$ Rs based on a conceptual model in Adkins and Taylor (1999) Curr Biol 9:1115-1118. IP $_3$ R opening requires sequential binding of IP $_3$  and Ca $^{2+}$ . IP $_3$  binding serves to switch the Ca $^{2+}$  sensitivity of IP $_3$ Rs by causing inhibitory sites to be masked and a stimulatory site to be exposed.

E, Ca $^{2+}$  release, leaks, and clearance.

We modeled Ca $^{2+}$  release through the IP $_3$ R Ca $^{2+}$  channels, Ca $^{2+}$  leaks through the plasma membrane and ER, and Ca $^{2+}$  clearance by Ca $^{2+}$  pumps (SERCA and PMCA) and exchangers. We assumed that molecules do not diffuse through the spine neck.

F, Ca $^{2+}$  buffer proteins in the cytosol.

In cells, 99% of the Ca $^{2+}$  ions are buffered with endogenous Ca $^{2+}$ -binding proteins. In particular, cerebellar Purkinje cells contain Ca $^{2+}$  buffers at high concentrations, and the binding ratio is more than 1000 (Fierro and Llano (1996) J Physiol 496:617-625). In addition, Ca $^{2+}$  indicators play a role of exogenous buffers. The binding ratio dependent on [Ca $^{2+}$ ] $_i$  was extensively investigated in Maeda *et al.* (1999) Neuron 24:989-1002.

Supplemental Figure 1A

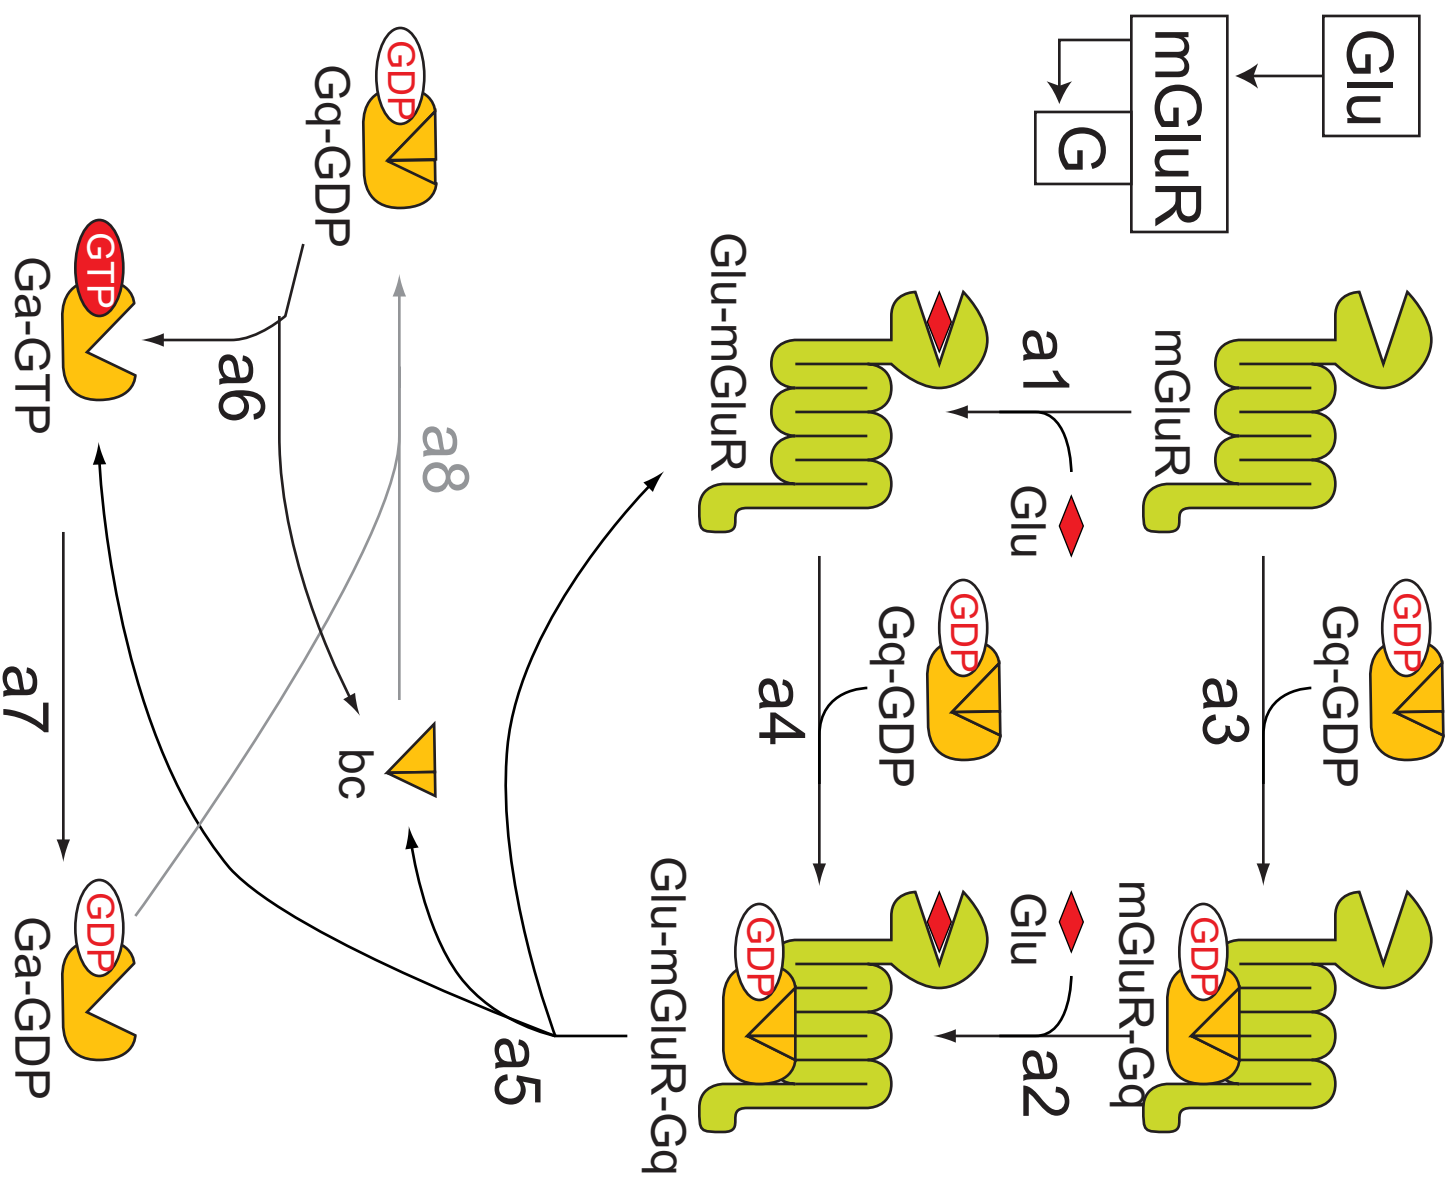

# Supplemental Figure 1B

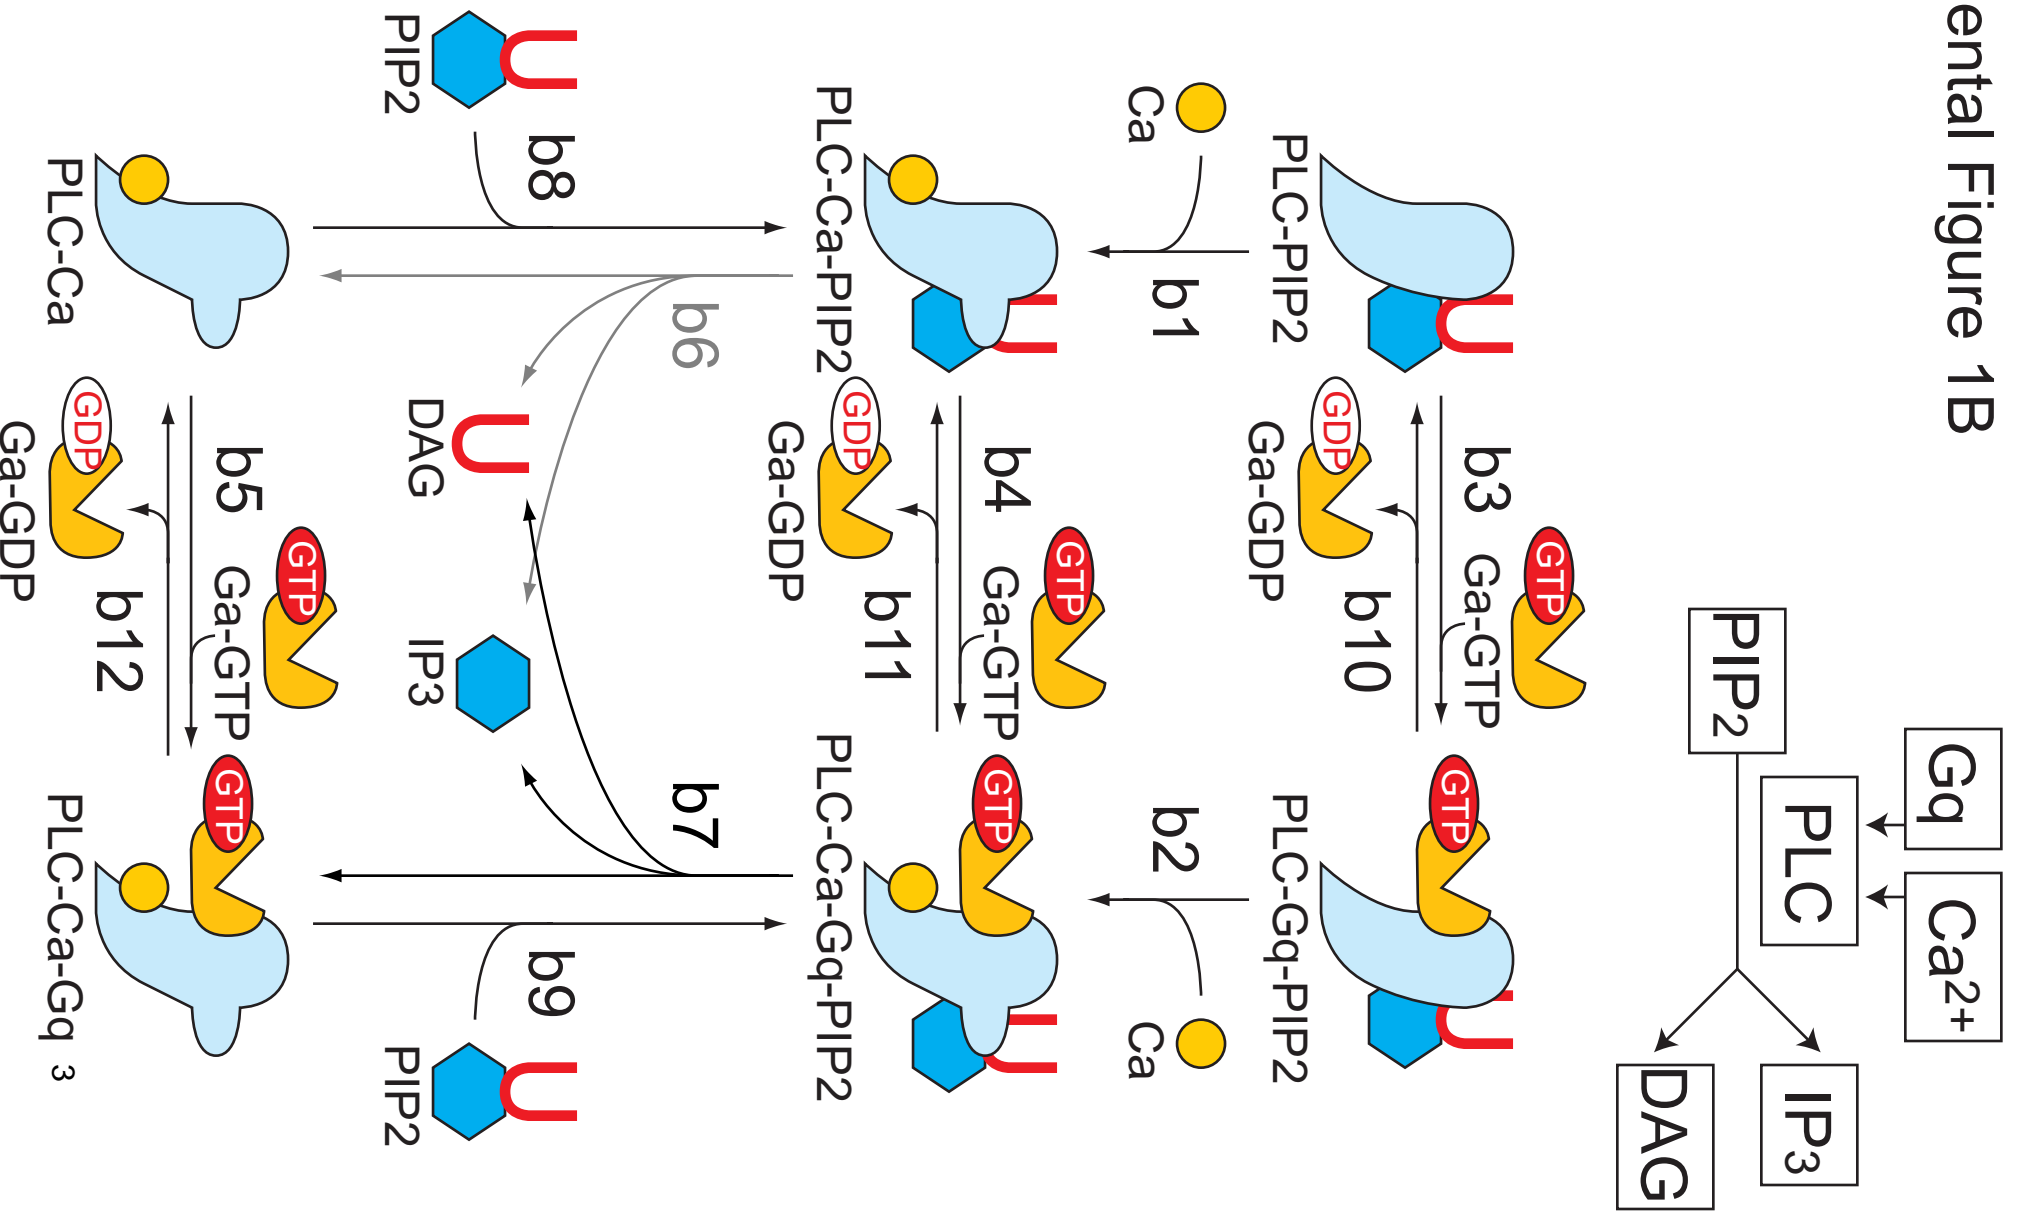

# Supplemental Figure 1C

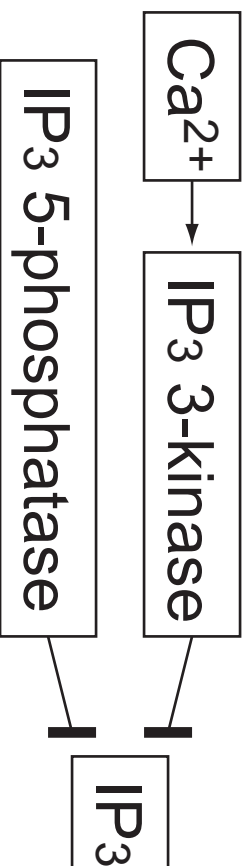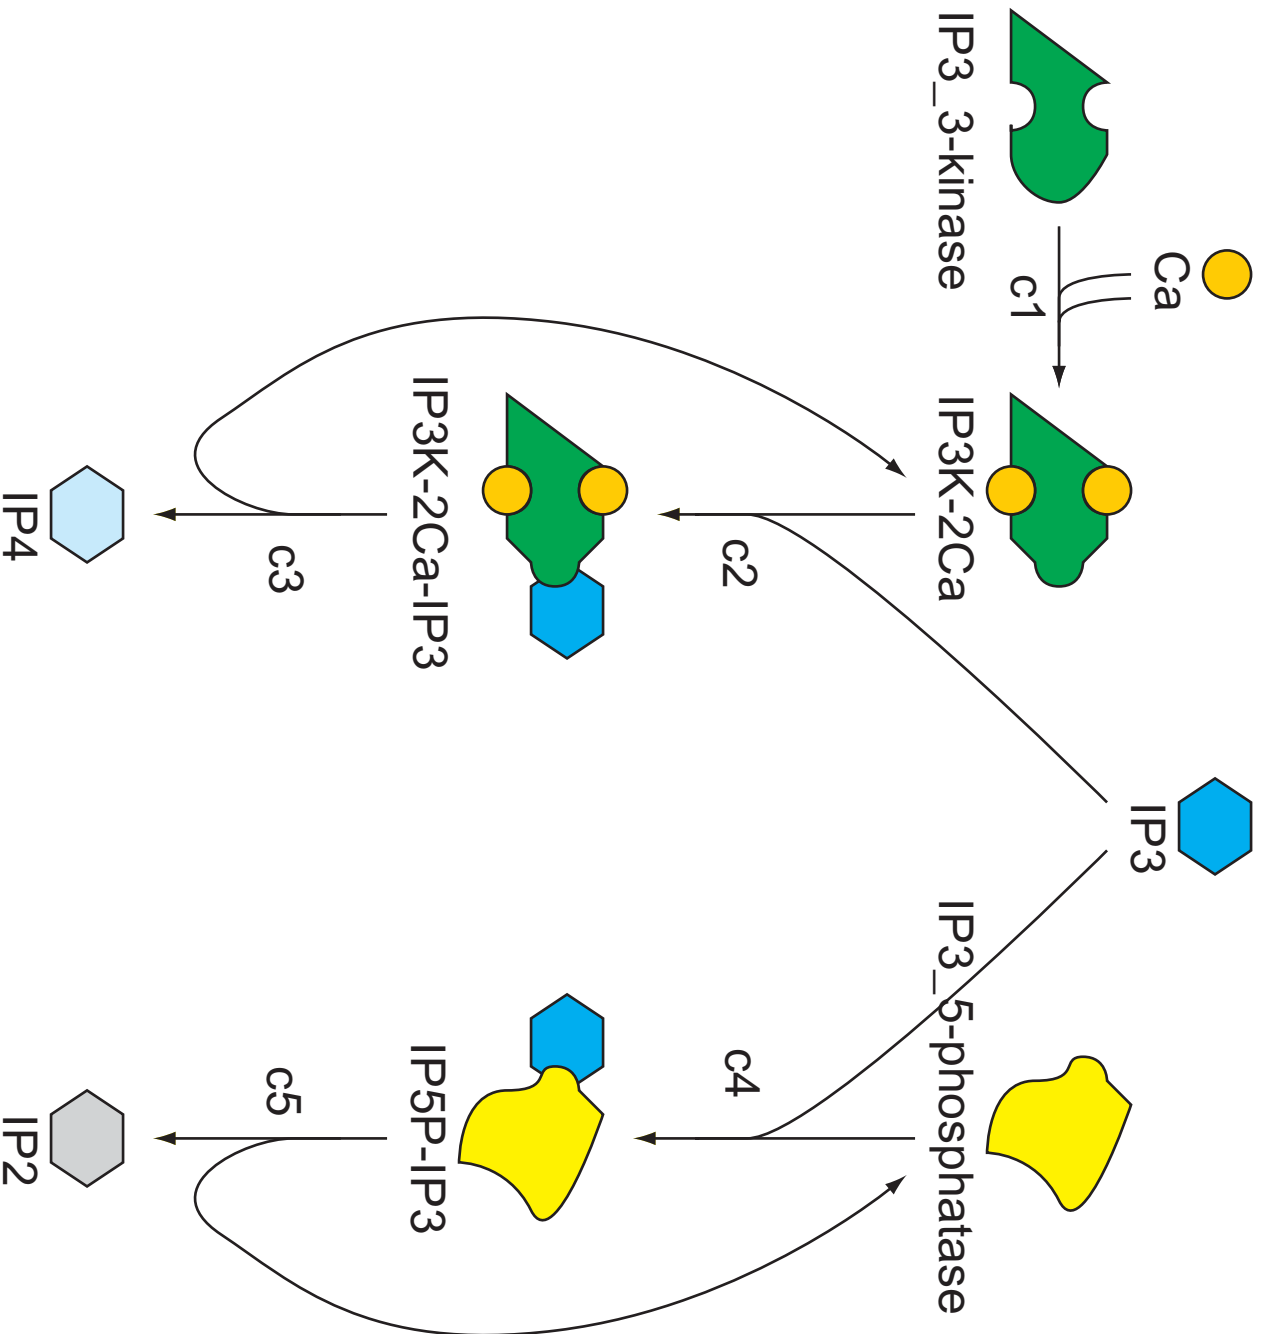

# Supplemental Figure 1D

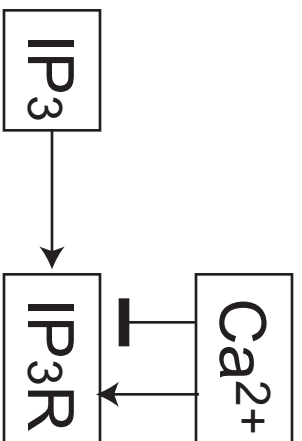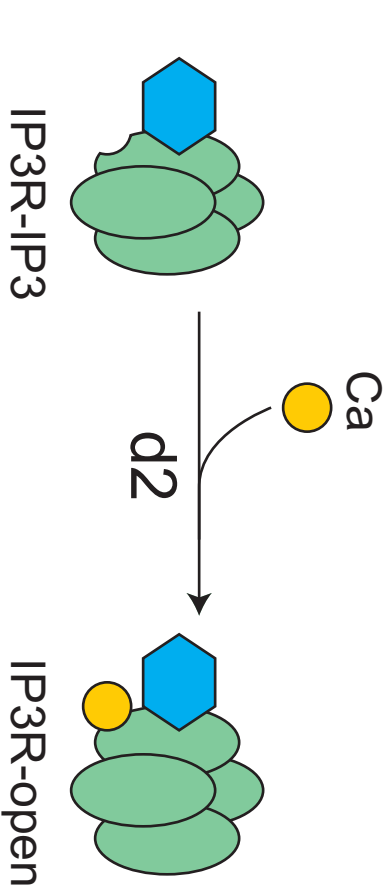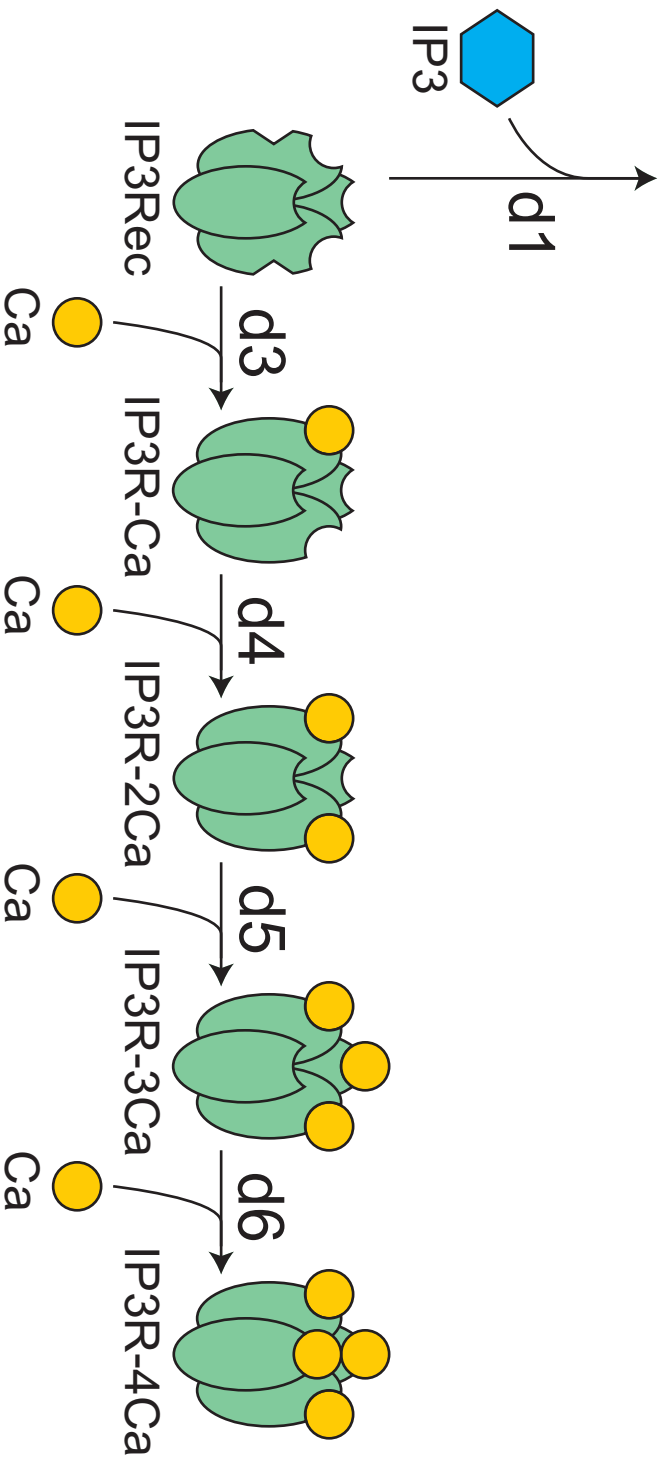

Supplemental Figure 1E

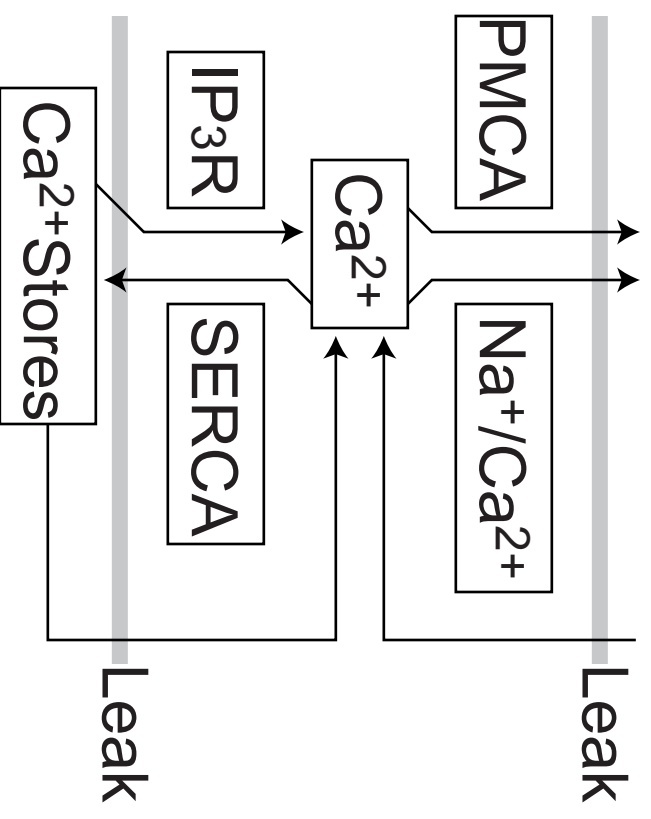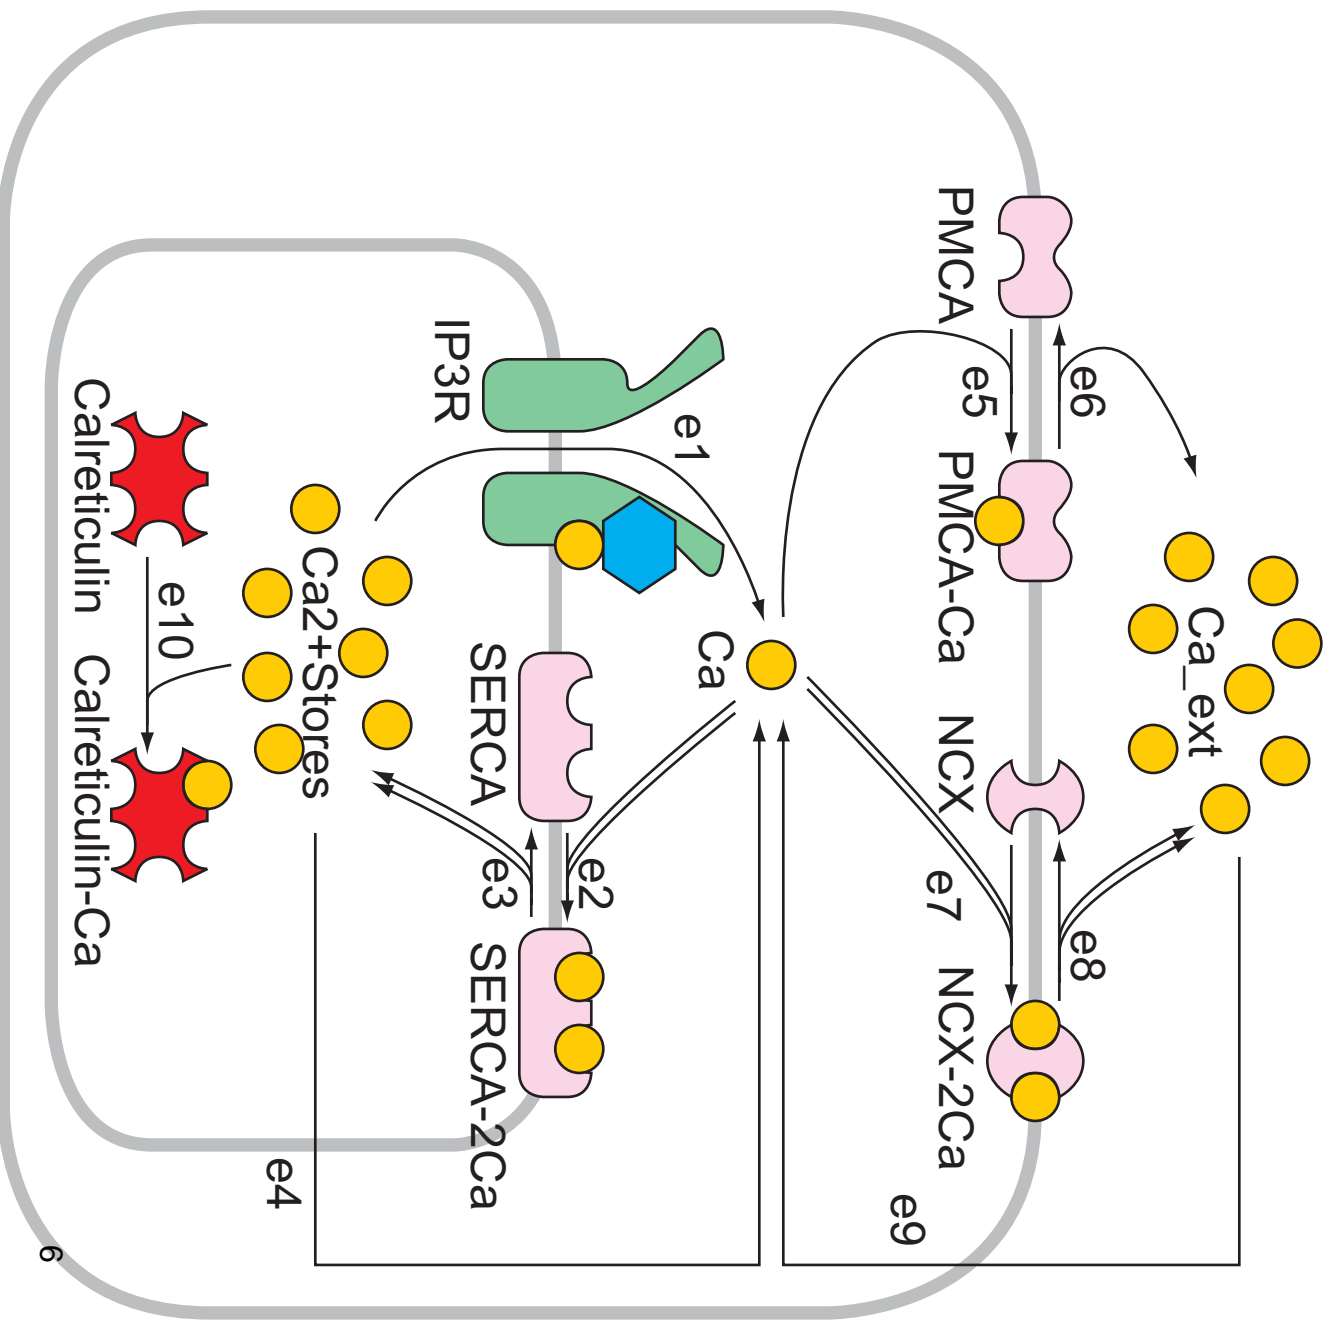

# Supplemental Figure 1F

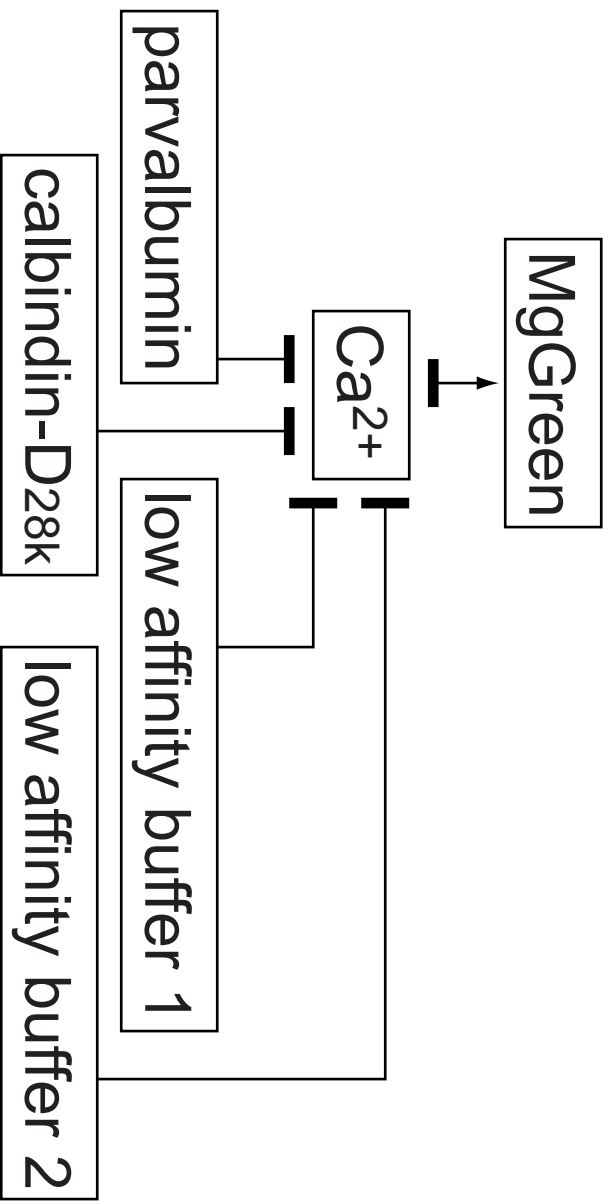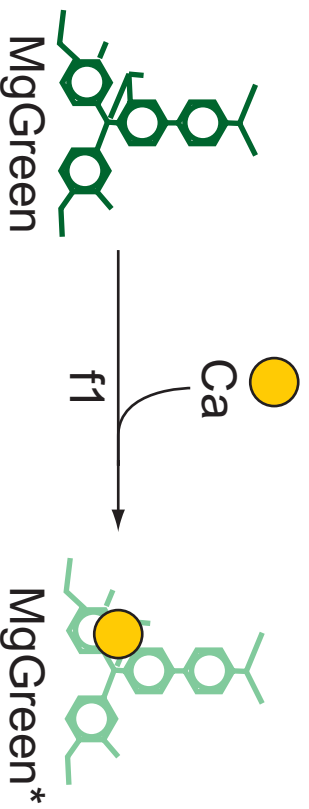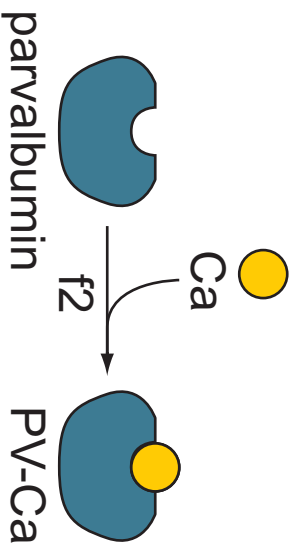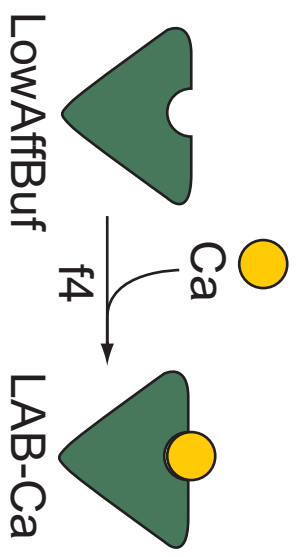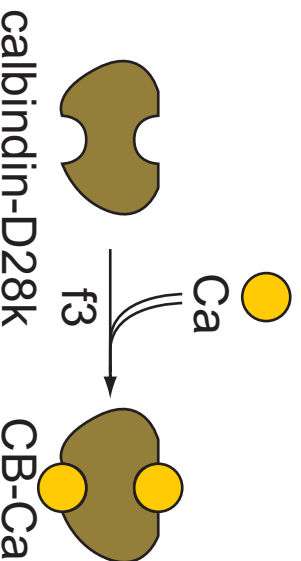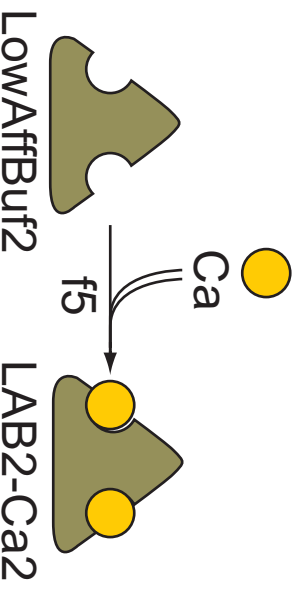

Supplemental Tables: Parameter Tables

Supplemental Table 1: Molecular numbers and concentrations in the initial condition

| ID | Group | Molecular Name | #  | Total # | Conc. (μM) | Total Conc. | Notes                                                                                                                                                                                                                                                                                                                                                                                                                                                                                                                                                                                                                                                                                                                                                                                                                                                                    |
|----|-------|----------------|----|---------|------------|-------------|--------------------------------------------------------------------------------------------------------------------------------------------------------------------------------------------------------------------------------------------------------------------------------------------------------------------------------------------------------------------------------------------------------------------------------------------------------------------------------------------------------------------------------------------------------------------------------------------------------------------------------------------------------------------------------------------------------------------------------------------------------------------------------------------------------------------------------------------------------------------------|
| A1 | mGluR | Glu            | 0  | 300     | 0          | 250         | Glutamate released at the synaptic cleft should be removed within milliseconds because individual EPSC responses can be seen with high-frequency stimuli (100 Hz), for instance, in Takechi <i>et al.</i> (1998) Nature 396:757-760. Thus, we estimated that the decaying time constant of Glu is 5 msec. The initial number of Glu that access mGluRs localized at the edge of PSD was set to 300, because concentration in neurotransmitter at the edge of spine is less than that at the center of spine (Franks <i>et al.</i> (2003) J Neurosci 23:3186-3195). This amount of Glu is sufficient to activate most of the mGluRs. # in the Supplemental Tables indicates the initial number of the molecules in its present state, and the total # indicates the total number of the molecules in any state.                                                           |
| A2 | mGluR | mGluR          | 10 | 18      | 8.3333     | 15          | Metabotropic glutamate receptor type 1. Although the characteristic of this receptor was examined in two first cloning papers (Masu <i>et al.</i> (1991) Nature 349:760-765; Houamed <i>et al.</i> (1991) Science 252:1318-1321), we cannot estimate [mGluR] because the receptors were overexpressed by functional expression in <i>Xenopus</i> oocytes. In Bhalla and Iyengar (1999) Science 283:381-387, they estimated 0.3 μM mGluR in a cell, and we took this value. Since the volume of the cytosol in the spine is 0.1 μm <sup>3</sup> in our model, the number of mGluRs was estimated to be 18. The number is similar to those of AMPARs and VGCCs in a hippocampal dendritic spine (Matsuzaki <i>et al.</i> (2001) Nat Neurosci 4:1086-1092; Sabatini and Svoboda (2000) Nature 408:589-593). We modeled that mGluRs localize at the PSD, which has 1/50-fold |



| ID | Group | Molecular Name  | #    | Total # | Conc. ( $\mu\text{M}$ ) | Total Conc. | Notes                                                                                                                                                                                                                                                                                                                                  |
|----|-------|-----------------|------|---------|-------------------------|-------------|----------------------------------------------------------------------------------------------------------------------------------------------------------------------------------------------------------------------------------------------------------------------------------------------------------------------------------------|
|    |       |                 |      |         |                         |             | volume of the cytosol. We obtained 8.3333 $\mu\text{M}$ mGluR in the PSD.                                                                                                                                                                                                                                                              |
| A3 | mGluR | mGluR-Glu       | 0    | 18      | 0                       | 15          | mGluRs activated by Glu binding.                                                                                                                                                                                                                                                                                                       |
| A4 | mGluR | Gq-GDP          | 52   | 60      | 43.333                  | 50          | Trimeric G-protein Gq family. In Bhalla and Iyengar (1999) Science 283:381-387, they estimated 1.0 $\mu\text{M}$ Gq in a cell. Since the cytosolic volume in the spine is 0.1 $\mu\text{m}^3$ , the number of Gq was estimated to be 60. We obtained 50 $\mu\text{M}$ Gq in the PSD because the cytosol has 50-fold volume of the PSD. |
| A5 | mGluR | mGluR-Gq        | 8    | 18      | 6.6667                  | 15          | mGluRs binding to Gq without Glu. It is not clear whether mGluRs and Gq form complex before ligand stimulation (small $K_d$ ), or ligand stimulation on mGluRs leads to the binding of mGluRs and Gq (large $K_d$ ). In this model, we assumed half of the mGluRs bind Gq before glutamate release.                                    |
| A6 | mGluR | Glu-mGluR-Gq    | 0    | 18      | 0                       | 15          | Intermediated state for Gq activation of Glu-mGluR-Gq complex.                                                                                                                                                                                                                                                                         |
| A7 | mGluR | G $\alpha$ -GTP | 0    | 60      | 0                       | 50          | Activated G $\alpha$ subunit. Gq-GTP binds PLC $\beta$ to enhance IP $_3$ productivity of PLC $\beta$ .                                                                                                                                                                                                                                |
| A8 | mGluR | Gbc             | 0    | 60      | 0                       | 50          | G-protein $\beta\gamma$ complex. In this simulation, there are no proteins activated by G $\beta\gamma$ .                                                                                                                                                                                                                              |
| A9 | mGluR | G $\alpha$ -GDP | 0    | 60      | 0                       | 50          | Inactivated G $\alpha$ subunit. G $\alpha$ -GDP rapidly binds G $\beta\gamma$ to form a trimer.                                                                                                                                                                                                                                        |
| B1 | PLC   | PIP $_2$        | 5000 | 5000    | 4166.7                  | 4166.7      | Phosphatidylinositol-4,5-bisphosphate. Molecular biology of the cell 4 <sup>th</sup> edition says that 5000000 lipid molecules exist in a 1 $\mu\text{m}^2$ area of the plasma membrane. Since PIP $_2$ is a minor lipid (less than 1%), the number of PIP $_2$ in the PSD was estimated to be 5000.                                   |
| B2 | PLC   | PLC-PIP $_2$    | 42   | 50      | 35                      | 41.667      | PLC $\beta$ subtype 4. We modeled PLC $\beta$ to bind PIP $_2$ before PLC activation by Ca $^{2+}$ , because PIP $_2$ concentration is high enough to bind almost all PLC in saturation. Bhalla and Iyengar (1999)                                                                                                                     |

| ID | Group  | Molecular Name | #    | Total # | Conc.<br>( $\mu\text{M}$ ) | Total<br>Conc. | Notes                                                                                                                                                                                                                                                                                                                                                                                                                                                                                                                   |
|----|--------|----------------|------|---------|----------------------------|----------------|-------------------------------------------------------------------------------------------------------------------------------------------------------------------------------------------------------------------------------------------------------------------------------------------------------------------------------------------------------------------------------------------------------------------------------------------------------------------------------------------------------------------------|
|    |        |                |      |         |                            |                | Science 283:381-387 estimated 0.8 $\mu\text{M}$ PLC $\beta$ in a cell. Since the cytosolic volume in the spine is 0.1 $\mu\text{m}^3$ , the number of Gq was estimated to be 50. We obtained 42 $\mu\text{M}$ PLC $\beta$ in the PSD because the cytosol has 50-fold volume of the PSD.                                                                                                                                                                                                                                 |
| B3 | PLC    | PLC-PIP2-Ca    | 7.5  | 50      | 6.25                       | 41.667         | Without Gq, PLC $\beta$ activity is very low.                                                                                                                                                                                                                                                                                                                                                                                                                                                                           |
| B4 | PLC    | PLC-PIP2-Gq    | 0    | 50      | 0                          | 41.667         | This state has no enzyme activity. PLC $\beta$ 4 requires $\text{Ca}^{2+}$ for activation.                                                                                                                                                                                                                                                                                                                                                                                                                              |
| B5 | PLC    | PLC-PIP2-Ca-Gq | 0    | 50      | 0                          | 41.667         | Fully activated form of PLC $\beta$ 4. PLC $\beta$ hydrolyzes PIP <sub>2</sub> into DAG and IP <sub>3</sub> . PLC $\beta$ 4 activation is dependent on Gq, whereas some other PLC $\beta$ subtypes are not.                                                                                                                                                                                                                                                                                                             |
| B6 | PLC    | PLC-Ca         | 0.5  | 50      | 0                          | 41.667         | The intermediate states of PLC $\beta$ that do not bind PIP <sub>2</sub> . We assumed that PLC $\beta$ in the basal states bind PIP <sub>2</sub> .                                                                                                                                                                                                                                                                                                                                                                      |
| B7 | PLC    | PLC-Ca-Gq      | 0    | 50      | 0                          | 41.667         |                                                                                                                                                                                                                                                                                                                                                                                                                                                                                                                         |
| B8 | PLC    | DAG            | 0    | 0       | 0                          | 0              | Diacylglycerol activates no enzyme in the model because we do not implement DAG-dependent enzymes such as protein kinase C.                                                                                                                                                                                                                                                                                                                                                                                             |
| B9 | PLC    | IP3_PSD        | 0.12 | 12      | 0.1                        | 10             | IP <sub>3</sub> is produced by PLC $\beta$ in the PSD and diffuses to the cytosol.                                                                                                                                                                                                                                                                                                                                                                                                                                      |
| C1 | IP3deg | IP3_spine      | 6    | 600     | 0.1                        | 10             | We set the basal [IP <sub>3</sub> ] to 0.1 $\mu\text{M}$ in this simulation. [IP <sub>3</sub> ] measurement in living cells is difficult. The only report is Luzzi <i>et al.</i> (1998) J Biol Chem 273:28657-28662. They estimated 0.04 $\mu\text{M}$ IP <sub>3</sub> in <i>Xenopus</i> Oocytes by using capillary electrophoresis.                                                                                                                                                                                    |
| C2 | IP3deg | IP3_3-kinase   | 52   | 54      | 0.86667                    | 0.9            | IP <sub>3</sub> 3-kinase, which phosphorylates IP <sub>3</sub> to IP <sub>4</sub> . In Takazawa <i>et al.</i> (1989) Biochem J 261:483-488, 0.020 mg of protein was purified from 700 g of bovine brain tissue. The yield was 4.4% and the molecular weight was 35000. Thus, 0.020 mg x (100%/4.4%) / (35000 g/mol) / 0.7 liter = 0.019 $\mu\text{M}$ while assuming the specific gravity of the tissue 1 kg/liter. This enzyme is highly localized in Purkinje dendritic spines (Yamada <i>et al.</i> (1993) Brain Res |

| ID | Group  | Molecular Name           | #     | Total # | Conc.<br>( $\mu\text{M}$ ) | Total<br>Conc. | Notes                                                                                                                                                                                                                                                                                                                                                                                                                                                                                                                                                                                                                                 |
|----|--------|--------------------------|-------|---------|----------------------------|----------------|---------------------------------------------------------------------------------------------------------------------------------------------------------------------------------------------------------------------------------------------------------------------------------------------------------------------------------------------------------------------------------------------------------------------------------------------------------------------------------------------------------------------------------------------------------------------------------------------------------------------------------------|
|    |        |                          |       |         |                            |                | 606:335-340; Go <i>et al.</i> (1993) <i>Neurosci Lett</i> 158:135-138).<br>Therefore, we increased [IP3K] to 0.9 $\mu\text{M}$ .                                                                                                                                                                                                                                                                                                                                                                                                                                                                                                      |
| C3 | IP3deg | IP3K-2Ca                 | 2     | 54      | 0.033333                   | 0.9            | Ca <sup>2+</sup> -bound state of IP3K.                                                                                                                                                                                                                                                                                                                                                                                                                                                                                                                                                                                                |
| C4 | IP3deg | IP3K-2Ca-IP <sub>3</sub> | 0     | 54      | 0                          | 0.9            | Ca <sup>2+</sup> - and IP <sub>3</sub> -bound state of IP3K.                                                                                                                                                                                                                                                                                                                                                                                                                                                                                                                                                                          |
| C5 | IP3deg | IP <sub>3</sub> _5-phos  | 58.8  | 60      | 0.98                       | 1              | IP <sub>3</sub> 5-phosphatase, which dephosphorylates IP <sub>3</sub> to IP <sub>2</sub> . From Verjans <i>et al.</i> (1992) <i>Eur J Biochem</i> 204:1083-1087, 0.806 mg of IP5P was obtained from 2 kg of brain tissue. The yield was 15% and the molecular weight was 43,000. Thus, 0.806 mg x (100%/15%) / (43000 g/mol) / 2 liter brain = 0.06 $\mu\text{M}$ , while assuming the specific gravity of the tissue 1 kg/liter. A study using antibodies showed that the enzyme was highly expressed in the Purkinje neurons (De Smedt <i>et al.</i> (1996) <i>JBC</i> 271:10419-10424). Thus, we increased it to 1 $\mu\text{M}$ . |
| C6 | IP3deg | IP5P-IP <sub>3</sub>     | 1.2   | 60      | 0.02                       | 1              | Intermediate binding state of IP <sub>3</sub> 5-phosphatase and IP <sub>3</sub> .                                                                                                                                                                                                                                                                                                                                                                                                                                                                                                                                                     |
| D1 | IP3R   | IP3Rec                   | 14.22 | 16      | 0.237                      | 0.26667        | IP <sub>3</sub> R type 1 is highly expressed in Purkinje cells. We counted 16 immunogold spots in the figure of the PF spine slice in Otsu <i>et al.</i> (1990) <i>Cell Struct Function</i> 15:163-173. Since the slice has 1/4 thickness of a spine and IP <sub>3</sub> Rs are homotetramers, the number of IP <sub>3</sub> Rs in a PF spine was estimated to be 16 (= 16 / (1/4) / 4).                                                                                                                                                                                                                                              |
| D2 | IP3R   | IP3R-IP <sub>3</sub>     | 0.06  | 16      | 0.1                        | 0.26667        | IP <sub>3</sub> -bound state of IP <sub>3</sub> Rs. In our IP <sub>3</sub> R kinetics model, IP <sub>3</sub> binding to IP <sub>3</sub> Rs allows activation of the IP <sub>3</sub> Rs by Ca <sup>2+</sup> .                                                                                                                                                                                                                                                                                                                                                                                                                          |
| D3 | IP3R   | IP3R_open                | 0.01  | 16      | 0.00016667                 | 0.26667        | Open state of IP <sub>3</sub> Rs.                                                                                                                                                                                                                                                                                                                                                                                                                                                                                                                                                                                                     |
| D4 | IP3R   | IP3R-Ca                  | 1.5   | 16      | 0.025                      | 0.26667        | Inactivation state of IP <sub>3</sub> Rs, bound to one Ca <sup>2+</sup> ion.                                                                                                                                                                                                                                                                                                                                                                                                                                                                                                                                                          |
| D5 | IP3R   | IP3R-2Ca                 | 0.18  | 16      | 0.003                      | 0.26667        | Inactivation state of IP <sub>3</sub> Rs, bound to two Ca <sup>2+</sup> ions.                                                                                                                                                                                                                                                                                                                                                                                                                                                                                                                                                         |
| D6 | IP3R   | IP3R-3Ca                 | 0.03  | 16      | 0.0005                     | 0.26667        | Inactivation state of IP <sub>3</sub> Rs, bound to three Ca <sup>2+</sup> ions.                                                                                                                                                                                                                                                                                                                                                                                                                                                                                                                                                       |
| D7 | IP3R   | IP3R-4Ca                 | 0     | 16      | 0                          | 0.26667        | Inactivation state of IP <sub>3</sub> Rs, bound to four Ca <sup>2+</sup> ions.                                                                                                                                                                                                                                                                                                                                                                                                                                                                                                                                                        |

| ID | Group | Molecular Name | #     | Total # | Conc.<br>( $\mu\text{M}$ ) | Total<br>Conc. | Notes                                                                                                                                                                                                                                                                                                                                                                                                                                                  |
|----|-------|----------------|-------|---------|----------------------------|----------------|--------------------------------------------------------------------------------------------------------------------------------------------------------------------------------------------------------------------------------------------------------------------------------------------------------------------------------------------------------------------------------------------------------------------------------------------------------|
| E1 | CaReg | CaSpine        | 3.6   | 3.6     | 0.06                       | 0.06           | Free cytosolic $\text{Ca}^{2+}$ concentration, $[\text{Ca}^{2+}]_i$ . The basal $[\text{Ca}^{2+}]_i$ is set to 0.06 $\mu\text{M}$ .                                                                                                                                                                                                                                                                                                                    |
| E2 | CaReg | Ca2+PSD        | 0.072 | 0.072   | 0.06                       | 0.06           | $\text{Ca}^{2+}$ concentration in the postsynaptic density. This concentration is used only for $\text{Ca}^{2+}$ -dependent PLC $\beta$ activation. It has a slight effect on IP $_3$ productivity of PLC $\beta$ in the PSD.                                                                                                                                                                                                                          |
| E3 | CaReg | SERCA          | 148   | 155     | 2.4667                     | 2.5833         | Sacro- and endoplasmic reticulum $\text{Ca}^{2+}$ -ATPase. SERCA is a dominant protein in the ER, constituting 80% of the ER membrane protein (Stryer Biochemistry 5 <sup>th</sup> edition). SERCA type 2 is dominant in the Purkinje cells (Takei <i>et al.</i> (1992) J Neurosci 12:489-505). We assumed the number of SERCA so that $[\text{Ca}^{2+}]_{\text{ER}}$ is 150 $\mu\text{M}$ at the basal state.                                         |
| E4 | CaReg | SERCA-2Ca      | 7     | 155     | 0.11667                    | 2.5833         | $\text{Ca}^{2+}$ -bound state of SERCA.                                                                                                                                                                                                                                                                                                                                                                                                                |
| E5 | CaReg | PMCA           | 68    | 108     | 1.1333                     | 1.8            | Plasma membrane $\text{Ca}^{2+}$ -ATPase. Type 2 of PMCA is abundant in Purkinje cells (de Talamoni <i>et al.</i> (1993) PNAS 90:11949-11953). PMCA has higher affinity and lower capacity than $\text{Na}^+/\text{Ca}^{2+}$ exchangers. At the basal $[\text{Ca}^{2+}]_i$ , PMCA pumps out much more $\text{Ca}^{2+}$ ions than $\text{Na}^+/\text{Ca}^{2+}$ . We chose [PMCA] so that $[\text{Ca}^{2+}]_i$ is 0.06 $\mu\text{M}$ at the basal state. |
| E6 | CaReg | PMCA-Ca        | 40    | 108     | 0.66667                    | 1.8            | $\text{Ca}^{2+}$ -bound state of PMCA.                                                                                                                                                                                                                                                                                                                                                                                                                 |
| E7 | CaReg | NCX            | 32    | 32      | 0.53333                    | 0.53333        | $\text{Na}^+/\text{Ca}^{2+}$ exchangers. They use $\text{Na}^+$ electrochemical gradient across the plasma membrane as their energy source. Note that we do not model membrane potential. NCXs play a major role in pumping out intracellular $\text{Ca}^{2+}$ at micromolar levels of $[\text{Ca}^{2+}]_i$ .                                                                                                                                          |
| E8 | CaReg | NCX-2Ca        | 0     | 32      | 0                          | 0.53333        | $\text{Ca}^{2+}$ -bound state of $\text{Na}^+/\text{Ca}^{2+}$ exchangers.                                                                                                                                                                                                                                                                                                                                                                              |
| E9 | CaReg | CaStore        | 1800  | 30000   | 150                        | 2500           | Free $\text{Ca}^{2+}$ concentration in the ER, $[\text{Ca}^{2+}]_{\text{ER}}$ , was previously assumed to be more than 1 mM in 1990s (for example, Fiala <i>et al.</i>                                                                                                                                                                                                                                                                                 |

| ID  | Group | Molecular Name  | #                 | Total #             | Conc.<br>( $\mu\text{M}$ ) | Total<br>Conc. | Notes                                                                                                                                                                                                                                                                                                                                                                                 |
|-----|-------|-----------------|-------------------|---------------------|----------------------------|----------------|---------------------------------------------------------------------------------------------------------------------------------------------------------------------------------------------------------------------------------------------------------------------------------------------------------------------------------------------------------------------------------------|
|     |       |                 |                   |                     |                            |                | (1996) <i>J Neurosci</i> 16:3760-3774; Bezprozvanny and Ehrlich (1994) <i>J Gen Physiol</i> 104:821-856). Recent studies using low-affinity $\text{Ca}^{2+}$ indicators implied $[\text{Ca}^{2+}]_{\text{ER}}$ at submicromolar levels (e.g. Park <i>et al.</i> (2000) <i>EMBO J</i> 19:5729-5739). Thus, we used 150 $\mu\text{M}$ $[\text{Ca}^{2+}]_{\text{ER}}$ in the simulation. |
| E10 | CaReg | calreticulin    | $9.6 \times 10^5$ | $1.032 \times 10^6$ | 80000                      | 86000          | A well-known $\text{Ca}^{2+}$ buffer in the ER. We took the $\text{Ca}^{2+}$ binding ratio in the ER to be 5. Bound $\text{Ca}^{2+}$ is 5 times free $\text{Ca}^{2+}$ in the ER at the basal $[\text{Ca}^{2+}]_{\text{ER}}$ .                                                                                                                                                         |
| E11 | CaReg | calreticulin-Ca | 72,000            | $1.032 \times 10^6$ | 6000                       | 86000          | $\text{Ca}^{2+}$ -bound state of calreticulin.                                                                                                                                                                                                                                                                                                                                        |
| E12 | CaReg | Ca_ext          | $1.2 \times 10^7$ | $1.2 \times 10^7$   | 2000                       | 2000           | Extracellular $\text{Ca}^{2+}$ concentration.                                                                                                                                                                                                                                                                                                                                         |
| F1  | CaBuf | MgGreen         | 14940             | 15000               | 249                        | 250            | Magnesium Green 1. This low-affinity $\text{Ca}^{2+}$ indicator was used at 250-500 $\mu\text{M}$ in Wang <i>et al.</i> (2000) <i>Nat Neurosci</i> 3:1266-1273. To compare our simulation results with the $\text{Ca}^{2+}$ imaging directly, we included 250 $\mu\text{M}$ MgGreen in our model.                                                                                     |
| F2  | CaBuf | MgGreen*        | 60                | 15000               | 1                          | 250            | $\text{Ca}^{2+}$ -bound form of MgGreen. MgGreen* ( $\text{Ca}^{2+}$ -bound form) has twice the fluorescence of MgGreen ( $\text{Ca}^{2+}$ -nonbound form). Thus, $F_{\text{max}}/F_{\text{min}} = 2$ .                                                                                                                                                                               |
| F3  | CaBuf | parvalbumin     | 1380              | 3000                | 23                         | 50             | Parvalbumin is highly expressed in GABAergic neurons, including Purkinje cells (de Talamoni <i>et al.</i> (1993) <i>PNAS</i> 90:11949-11953). Considering the high binding ratio at the basal $[\text{Ca}^{2+}]_i$ (Fierro and Llano (1996) <i>J Physiol</i> 496:617-625), the concentration in parvalbumin should be tens of micromolars.                                            |
| F4  | CaBuf | PV-Ca           | 1620              | 3000                | 27                         | 50             | $\text{Ca}^{2+}$ -bound state of parvalbumin.                                                                                                                                                                                                                                                                                                                                         |
| F5  | CaBuf | Calbindin-D28k  | 5850              | 6000                | 97.5                       | 100            | Calbindin-D <sub>28k</sub> is highly expressed in Purkinje cells. $\text{Ca}^{2+}$ decay in mutant mice with no calbindin-D <sub>28k</sub> gene was faster than in wild-type mice (Airaksinen <i>et al.</i> (1997) <i>PNAS</i> 94:1488-1493).                                                                                                                                         |

| ID  | Group | Molecular Name | #    | Total # | Conc.<br>( $\mu\text{M}$ ) | Total<br>Conc. | Notes                                                                                                                                                                                                                                                                                                                                                         |
|-----|-------|----------------|------|---------|----------------------------|----------------|---------------------------------------------------------------------------------------------------------------------------------------------------------------------------------------------------------------------------------------------------------------------------------------------------------------------------------------------------------------|
|     |       |                |      |         |                            |                | Although Maeda <i>et al.</i> (Neuron 24:989-1002 (1999)) studied the effect of $\text{Ca}^{2+}$ buffers in cerebellar Purkinje cells and estimated 360 $\mu\text{M}$ [CB], they neglected effects of other high-affinity buffers and $\text{Ca}^{2+}$ pumps dependent on $[\text{Ca}^{2+}]_i$ . [CB] was estimated to be 100 $\mu\text{M}$ in our simulation. |
| F6  | CaBuf | CB-2Ca         | 150  | 6000    | 2.5                        | 100            | $\text{Ca}^{2+}$ -bound state of calbindin- $\text{D}_{28\text{k}}$ .                                                                                                                                                                                                                                                                                         |
| F7  | CaBuf | LowAffBuf      | 5997 | 6000    | 99.95                      | 100            | Purkinje cells contain low-affinity buffers at high concentrations (Maeda <i>et al.</i> (1999) Neuron 24:989-1002). We fitted the binding ratio in our model to the binding ratio in their Fig. 6 by using two buffers. Low-affinity buffer 1 (LAB) is non-cooperative, and Hill coefficient is 1.                                                            |
| F8  | CaBuf | LAB-Ca         | 3    | 6000    | 0.05                       | 100            | $\text{Ca}^{2+}$ -bound state of low-affinity buffer 1.                                                                                                                                                                                                                                                                                                       |
| F9  | CaBuf | LowAffBuf2     | 6000 | 6000    | 100                        | 100            | Purkinje cells contain low-affinity buffers at high concentration (Maeda <i>et al.</i> (1999) Neuron 24:989-1002). We fitted the binding ratio curve in their Fig. 6 by using two buffers. Low-affinity buffer 2 (LAB2) is cooperative, and the Hill coefficient is 2.                                                                                        |
| F10 | CaBuf | LAB2-2Ca       | 0    | 6000    | 0                          | 100            | $\text{Ca}^{2+}$ -bound state of low-affinity buffer 2.                                                                                                                                                                                                                                                                                                       |

**Supplemental Table 2: Kinetic rate constants in the reactions**

| ID | Group | Reaction Name     | $k_f$  | $k_b$ (/sec) | $K_d$ ( $\mu\text{M}$ ) | Notes                                                                                                                                                                                                                                                                                                                                                                                                                                                                                                                                                                                                                                                           |
|----|-------|-------------------|--------|--------------|-------------------------|-----------------------------------------------------------------------------------------------------------------------------------------------------------------------------------------------------------------------------------------------------------------------------------------------------------------------------------------------------------------------------------------------------------------------------------------------------------------------------------------------------------------------------------------------------------------------------------------------------------------------------------------------------------------|
| a1 | mGluR | Glu_bind_mGluR    | 11.11  | 100          | 9                       | The dependency of slow EPSCs on glutamate concentrations was measured in the first two cloning papers (Masu <i>et al.</i> (1991) Nature 349:760-765; Houamed <i>et al.</i> (1991) Science 252:1318-1321). We took the $K_d$ value from Masu <i>et al.</i> (1991) Nature 349:760-765.                                                                                                                                                                                                                                                                                                                                                                            |
| a2 | mGluR | Glu_bind_mGluR-Gq | 11.11  | 100          | 9                       |                                                                                                                                                                                                                                                                                                                                                                                                                                                                                                                                                                                                                                                                 |
| a3 | mGluR | mGluR_bind_Gq     | 2      | 100          | 50                      | The value of $K_d$ influences whether mGluRs can bind Gq in the resting state. Higher $K_d$ tends to allow mGluRs to bind Gq before glutamate release, whereas lower $K_d$ does not. We assumed that half of the mGluRs are bound to Gq at the basal state.                                                                                                                                                                                                                                                                                                                                                                                                     |
| a4 | mGluR | mGluR-Glu_bind_Gq | 2      | 100          | 50                      | The detailed balance determines the $K_d$ value from the loop, mGluR $\rightarrow$ Glu-mGluR $\rightarrow$ Glu-mGluR-Gq $\rightarrow$ mGluR-Gq $\rightarrow$ mGluR.                                                                                                                                                                                                                                                                                                                                                                                                                                                                                             |
| a5 | mGluR | Activate_Gq       | 116    |              |                         | As far as we know, there is only one paper that measured $k_{cat}$ for Gq activation by G-protein coupled receptors (Fay <i>et al.</i> (1991) Biochemistry 30:5066-5075). Unfortunately, they used muscarinic cholinergic receptors (mAChRs), not mGluRs, as G-protein coupled receptors. Reported $k_{cat}$ value was 0.01 /sec, and taken in two simulation papers (Fiala <i>et al.</i> (1996) J Neurosci 16:3760-3774; Bhalla and Iyengar (1999) Science 283:381-387). This value was too small to yield micromolar IP <sub>3</sub> concentrations in our simulation. We neglect the reported parameter value and arbitrarily assumed $k_{cat}$ of 116 /sec. |
| a6 | mGluR | Basal-ActGq       | 0.0001 |              |                         | Basal activity of exchange of GDP to GTP in Gq. The reaction is so slow that it can be neglected.                                                                                                                                                                                                                                                                                                                                                                                                                                                                                                                                                               |
| a7 | mGluR | Inact_Gq          | 0.02   |              |                         | From Berstein <i>et al.</i> (1992) JBC 267:8081-8088, $k_{cat}$ for GTPase activity of Gq itself is only 0.8 /min. Gq inactivation is facilitated by PLC in this simulation.                                                                                                                                                                                                                                                                                                                                                                                                                                                                                    |
| a8 | mGluR | Trimerize_Gq      | 6      |              |                         | The parameter value determines the speed of binding Gq $\alpha$ -GDP and Gq $\beta\gamma$ . This reaction is thought to be fast. We used the same value as in Bhalla and Iyengar (1999) Science 283:381-387. Although 6 /sec of $k_f$ might seem to be small, trimerization completes within 1 sec after glutamate stimulation.                                                                                                                                                                                                                                                                                                                                 |
| b1 | PLC   | PLC-PIP2_bind_Ca  | 300    | 100          | 0.3333                  | Ca <sup>2+</sup> -dependency of PLC $\beta$ 4 activity has not been quantitatively measured. We                                                                                                                                                                                                                                                                                                                                                                                                                                                                                                                                                                 |

| ID  | Group  | Reaction Name           | $k_f$  | $k_b$ (/sec) | $K_d$ ( $\mu\text{M}$ ) | Notes                                                                                                                                                                                                                                                                                                                                                        |
|-----|--------|-------------------------|--------|--------------|-------------------------|--------------------------------------------------------------------------------------------------------------------------------------------------------------------------------------------------------------------------------------------------------------------------------------------------------------------------------------------------------------|
|     |        |                         |        |              |                         | took the $K_d$ value from the parameters in PLC $\beta$ 1 (Smrcka <i>et al.</i> (1991) Science 251:804-807), as well as Bhalla and Iyengar (1999) Science 283:381-387.                                                                                                                                                                                       |
| b2  | PLC    | PLC-PIP2-Gq_bind_Ca     | 900    | 30           | 0.03333                 | Ca <sup>2+</sup> -dependency of PLC $\beta$ 4 activity has not been quantitatively measured. We took the $K_d$ value from the parameters in PLC $\beta$ 1 (Smrcka <i>et al.</i> (1991) Science 251:804-807), as Bhalla and Iyengar (Science 283:381-387 (1999)) did. Note that the basal [Ca <sup>2+</sup> ] <sub>i</sub> is enough to activate PLC-PIP2-Gq. |
| b3  | PLC    | PLC-PIP2_bind_Gq        | 800    | 40           | 0.05                    | The detailed balance determines the $K_d$ value from the loop, PLC-PIP2 $\rightarrow$ PLC-Ca-PIP2 $\rightarrow$ PLC-Ca-Ga-PIP2 $\rightarrow$ PLC-Gq-PIP2 $\rightarrow$ PLC-PIP2.                                                                                                                                                                             |
| b4  | PLC    | PLC-PIP2-Ca_bind_Gq     | 1200   | 6            | 0.005                   | From Fig. 4 in Lee <i>et al.</i> (1994) JBC 269:25335-25338, affinity for G $\alpha$ q is 5 nM.                                                                                                                                                                                                                                                              |
| b5  | PLC    | PLC-Ca_bind_Gq          | 1200   | 6            | 0.005                   | Because of this high affinity, most of the activated G $\alpha$ bind PLC $\beta$ in our simulation.                                                                                                                                                                                                                                                          |
| b6  | PLC    | IP3_prd_without_Gq      | 2      |              |                         | PLC $\beta$ 4 has basal activity of IP <sub>3</sub> production without Gq. The measurement of this activity is difficult because PLC $\beta$ 4 is inhibited by ribonucleotides (Lee <i>et al.</i> (1994) JBC 269:25335-25338). Therefore, we assumed this parameter to hold basal [IP <sub>3</sub> ] at 0.1 $\mu\text{M}$ .                                  |
| b7  | PLC    | IP3_prd_with_Gq         | 160    |              |                         | The measurement of this enzyme activity is difficult because PLC $\beta$ 4 is inhibited by ribonucleotides (Lee <i>et al.</i> (1994) JBC 269:25335-25338). We used the activity of PLC $\beta$ 1 in Mishra and Bhalla (2002) Biophys J 83:1298-1316.                                                                                                         |
| b8  | PLC    | PLC-Ca_bind_PIP2        | 1      | 170          | 170                     | A biochemical paper reported $K_m$ of 100-200 $\mu\text{M}$ for PIP <sub>2</sub> in several types of PLC $\beta$ (James <i>et al.</i> (1995) JBC 270:11872-11881). We took the affinity of PLC $\beta$ 1 ( $K_m = 170 \mu\text{M}$ ).                                                                                                                        |
| b9  | PLC    | PLC-Ca-Gq_bind_PIP2     | 1      | 170          | 170                     |                                                                                                                                                                                                                                                                                                                                                              |
| b10 | PLC    | inact_Gq_by_PLC-PIP2    | 8      |              |                         | PLC $\beta$ 4 has GAP (G-protein activation protein) activity, which enhances the GTPase efficiency of Gq to thousands times. In the review of Montel (2000) Nat Cell Biol 2:E82-E83, the half-time of Gq inactivation is estimated to be 25-75 msec in the existence of PLC. We used the same activity among different PLC $\beta$ 4 states.                |
| b11 | PLC    | inact_Gq_by_PLC-PIP2-Ca | 8      |              |                         |                                                                                                                                                                                                                                                                                                                                                              |
| b12 | PLC    | inact_Gq_by_PLC-Ca      | 8      |              |                         |                                                                                                                                                                                                                                                                                                                                                              |
| c1  | IP3deg | IP3K_bind_2Ca           | 1111.1 | 100          | 0.3                     | We took the $K_d$ value from a Ca <sup>2+</sup> simulation paper (Dunplot and Erneux (1997))                                                                                                                                                                                                                                                                 |



| ID | Group  | Reaction Name     | $k_f$ | $k_b$ (/sec) | $K_d$ ( $\mu\text{M}$ ) | Notes                                                                                                                                                                                                                                                                                                                                                                                                                                                                                                                                                                                                                           |
|----|--------|-------------------|-------|--------------|-------------------------|---------------------------------------------------------------------------------------------------------------------------------------------------------------------------------------------------------------------------------------------------------------------------------------------------------------------------------------------------------------------------------------------------------------------------------------------------------------------------------------------------------------------------------------------------------------------------------------------------------------------------------|
|    |        |                   |       |              |                         | Cell Calcium 22:321-331). $K_m$ for $\text{Ca}^{2+}$ = 0.3 $\mu\text{M}$ and Hill coefficient = 2.                                                                                                                                                                                                                                                                                                                                                                                                                                                                                                                              |
| c2 | IP3deg | IP3K-2Ca_bind_IP3 | 100   | 80           | 0.8                     | We took the $K_m$ value from a $\text{Ca}^{2+}$ simulation paper (Dunplot and Erneux (1997) Cell Calcium 22:321-331). Michaelis constant $K_m$ is 1 $\mu\text{M}$ . $K_m = (k_b + k_{cat}) / k_f = (80 + 20) / 100 = 1 \mu\text{M}$ .                                                                                                                                                                                                                                                                                                                                                                                           |
| c3 | IP3deg | IP3K_deg_IP3      | 20    |              |                         | Several studies reported very different $V_{max}$ values (Irvine <i>et al.</i> (1986) Nature 320:631-634; Takazawa <i>et al.</i> (1989) Biochem J 261:483-488; Choi <i>et al.</i> (1990) Science 248:64-66). Thus, we did not take any reported value from these studies.                                                                                                                                                                                                                                                                                                                                                       |
| c4 | IP3deg | IP5P_bind_IP3     | 9     | 72           | 8                       | We took the $K_m$ value from a $\text{Ca}^{2+}$ simulation paper (Dunplot and Erneux (1997) Cell Calcium 22:321-331). Michaelis constant $K_m = 1 \mu\text{M}$ . $K_m = (k_b + k_{cat}) / k_f = (72 + 18) / 9 = 10 \mu\text{M}$ .                                                                                                                                                                                                                                                                                                                                                                                               |
| c5 | IP3deg | IP5P_deg_IP3      | 18    |              |                         | A purification study reported that $V_{max} = 20\text{-}35 \mu\text{mol}/\text{min}/\text{mg}$ protein (Verjans <i>et al.</i> (1992) Eur J Biochem 204:1083-1087). $\text{IP}_3$ 5-phosphatase is a 43kDa enzyme, and we obtained $k_{cat} = 20\text{-}35 \times 43000/60000 = 18 \text{ \#}/\text{sec}/\text{\#}$ protein. This unit conversion method was described in De Schutter (2000) Computational Neuroscience, CRC Press, Boca Raton, pp. 31.                                                                                                                                                                          |
| d1 | IP3R   | IP3R_bind_IP3     | 1000  | 25800        | 25.8                    | From measurement of $\text{Ca}^{2+}$ depletion of the ER stores, the affinity of $\text{IP}_3\text{Rs}$ for $\text{IP}_3$ in Purkinje cells is much lower ( $K_d = 25.8 \mu\text{M}$ ) than <i>in vitro</i> (Fujiwara <i>et al.</i> (2001) Neuroreport 12:2647-2651). The low affinity is consistent with the fact that $\text{Ca}^{2+}$ response to $\text{IP}_3$ uncaging in Purkinje cells require strong photostimulus ( $[\text{IP}_3] > 10 \mu\text{M}$ ) for (Khodakhah and Ogden (1993) PNAS 90:4976-4980; Finch and Augustine (1998) Nature 396:753-756). Thus, we used $K_d$ of 25.8 $\mu\text{M}$ in the simulation. |
| d2 | IP3R   | IP3R-IP3_bind_Ca  | 8000  | 2000         | 0.25                    | $\text{Ca}^{2+}$ directly binds to $\text{IP}_3\text{Rs}$ for activation. From a bell-shaped $\text{Ca}^{2+}$ -dependency of $\text{IP}_3\text{Rs}$ (Bezprozvanny and Ehrlich (1994) J Gen Physiol 104:821-856; Fujiwara <i>et al.</i> (2001) Neuroreport 12:2647-2651), we obtained $K_d = 0.25 \mu\text{M}$ . The reaction must be faster than $\text{Ca}^{2+}$ -dependent $\text{IP}_3\text{R}$ inactivation for $\text{Ca}^{2+}$ positive feedback.                                                                                                                                                                         |

| ID | Group | Reaction Name    | $k_f$ | $k_b$ (/sec) | $K_d$ ( $\mu\text{M}$ ) | Notes                                                                                                                                                                                                                                                                                                                                                                                                                                                                                                                                                                                                                                                                                                                                                                                                                                                                                                                                                                                                                                 |
|----|-------|------------------|-------|--------------|-------------------------|---------------------------------------------------------------------------------------------------------------------------------------------------------------------------------------------------------------------------------------------------------------------------------------------------------------------------------------------------------------------------------------------------------------------------------------------------------------------------------------------------------------------------------------------------------------------------------------------------------------------------------------------------------------------------------------------------------------------------------------------------------------------------------------------------------------------------------------------------------------------------------------------------------------------------------------------------------------------------------------------------------------------------------------|
| d3 | IP3R  | IP3R_bind_Ca     | 8.889 | 5            | 0.56249                 | IP <sub>3</sub> Rs are completely inactivated at high concentrations of $[\text{Ca}^{2+}]_i$ ( $< 10 \mu\text{M}$ ). In our kinetic model, an IP <sub>3</sub> R has four $\text{Ca}^{2+}$ inactivation sites. This sequential $\text{Ca}^{2+}$ binding reaction was assumed to be positively cooperative. In other words, $\text{Ca}^{2+}$ ions bind a subunit easier as more $\text{Ca}^{2+}$ binds to IP <sub>3</sub> Rs. How to estimate these parameters is written in $\text{Ca}^{2+}$ -dependent IP <sub>3</sub> R inactivation in the Material and Methods.                                                                                                                                                                                                                                                                                                                                                                                                                                                                    |
| d4 | IP3R  | IP3R-Ca_bind_Ca  | 20    | 10           | 0.5                     |                                                                                                                                                                                                                                                                                                                                                                                                                                                                                                                                                                                                                                                                                                                                                                                                                                                                                                                                                                                                                                       |
| d5 | IP3R  | IP3R-2Ca_bind_Ca | 40    | 15           | 0.375                   |                                                                                                                                                                                                                                                                                                                                                                                                                                                                                                                                                                                                                                                                                                                                                                                                                                                                                                                                                                                                                                       |
| d6 | IP3R  | IP3R-3Ca_bind_Ca | 60    | 20           | 0.33333                 |                                                                                                                                                                                                                                                                                                                                                                                                                                                                                                                                                                                                                                                                                                                                                                                                                                                                                                                                                                                                                                       |
| e1 | CaReg | IP3R_Ca_channel  | 450   | 450          | (perm)                  | In Bezprozvanny and Ehrlich (1994) J Gen Physiol 104:821-856, they estimated that 5400 $\text{Ca}^{2+}$ ions go through an open IP <sub>3</sub> R per second at 2500 $\mu\text{M}$ $[\text{Ca}^{2+}]_{\text{ER}}$ . The unit of permability is not described in GENESIS/kinetikit, but we found that the parameter value of 450 matches the estimation.                                                                                                                                                                                                                                                                                                                                                                                                                                                                                                                                                                                                                                                                               |
| e2 | CaReg | SERCA_bind_2Ca   | 17147 | 1000         | 0.24149                 | We took the kinetics parameter of SERCA subtype 2b from Lytton <i>et al.</i> (1992) JBC 267:14483-14489. $K_m = 0.27 \mu\text{M}$ and the Hill coefficient = 2. $K_m^2 = (k_b + k_{cat}) / k_f = (1000 + 250) / 17147 = (0.27 \mu\text{M})^2$ .                                                                                                                                                                                                                                                                                                                                                                                                                                                                                                                                                                                                                                                                                                                                                                                       |
| e3 | CaReg | SERCA_uptake     | 250   |              |                         | In Stryer Biochemistry 5 <sup>th</sup> edition, one SERCA pumps out less than 100 $\text{Ca}^{2+}$ ions per second. Thus, we took $k_{cat}$ value to be 50 /s at first, but the low $k_{cat}$ value caused a problem. The speed of $\text{Ca}^{2+}$ clearance does not increase in proportion to the number of $\text{Ca}^{2+}$ pumps because free $\text{Ca}^{2+}$ concentration becomes low and the $\text{Ca}^{2+}$ binding to the pump decreases in the large presence of $\text{Ca}^{2+}$ pumps with low $k_{cat}$ . We failed to reproduce $\text{Ca}^{2+}$ time course showed in Wang <i>et al.</i> (2000) Nat Neurosci 3:1266-1273 even if we increased the number of pumps. Following the fact that most of the other $\text{Ca}^{2+}$ simulation neglect the binding effect of $\text{Ca}^{2+}$ pumps, we decided to reduce the buffering effect by adjusting $k_{cat}$ and [SERCA], while keeping $V_{\text{max}} (= k_{cat} \times [\text{SERCA}])$ . Thus, we increased $k_{cat}$ 5-fold and decreased [SERCA] 1/5-fold. |
| e4 | CaReg | Ca_Leak_from_ER  | 15    | 15           | (perm)                  | This leak parameter was dependent on other parameters of $\text{Ca}^{2+}$ regulation.                                                                                                                                                                                                                                                                                                                                                                                                                                                                                                                                                                                                                                                                                                                                                                                                                                                                                                                                                 |
| e5 | CaReg | PMCA_bind_Ca     | 25000 | 2000         | 0.08                    | We took the kinetic parameters of PMCA subtype 2 from Stauffer <i>et al.</i> (1995) JBC 270:12184-12190. $K_m = 0.1 \mu\text{M}$ and Hill coefficient = 1. $K_m = (k_b + k_{cat}) / k_f = (500 + 2000) / 25000 = 0.1 \mu\text{M}$ .                                                                                                                                                                                                                                                                                                                                                                                                                                                                                                                                                                                                                                                                                                                                                                                                   |

| ID  | Group | Reaction Name        | $k_f$  | $k_b$ (/sec) | $K_d$ ( $\mu\text{M}$ ) | Notes                                                                                                                                                                                                                                                                                                                                                                                                                                                                                            |
|-----|-------|----------------------|--------|--------------|-------------------------|--------------------------------------------------------------------------------------------------------------------------------------------------------------------------------------------------------------------------------------------------------------------------------------------------------------------------------------------------------------------------------------------------------------------------------------------------------------------------------------------------|
| e6  | CaReg | PMCA_uptake          | 500    |              |                         | The capacity of PMCA was increased to 10 times (50 to 500) for the same reason as the increase in $k_{cat}$ for SERCA.                                                                                                                                                                                                                                                                                                                                                                           |
| e7  | CaReg | NCX_bind_2Ca         | 93.827 | 4000         | 6.5293                  | Since this model does not include voltage, the efficacy of $\text{Na}^+/\text{Ca}^{2+}$ uptake should be dependent only on $\text{Ca}^{2+}$ concentration, not on the membrane potential. In Fujioka <i>et al.</i> (2000) J Physiol 529:611-623, they measured $\text{Ca}^{2+}$ -dependent current of $\text{Na}^+/\text{Ca}^{2+}$ . $K_m$ for $\text{Ca}^{2+} = 7.3 \mu\text{M}$ and the Hill coefficient = 2. $K_m^2 = (k_b + k_{cat}) / k_f = (4000 + 1000) / 93.287 = (7.3 \mu\text{M})^2$ . |
| e8  | CaReg | NCX_uptake           | 1000   |              |                         | Stryer Biochemistry 5 <sup>th</sup> edition says that a $\text{Na}^+/\text{Ca}^{2+}$ can extrude 2,000 $\text{Ca}^{2+}$ ions per second. Since the Hill coefficient is 2, a $\text{Na}^+/\text{Ca}^{2+}$ transports 2 $\text{Ca}^{2+}$ ions at one reaction cycle. Thus, $k_{cat} = 2000/2 = 1000 /s$ .                                                                                                                                                                                          |
| e9  | CaReg | Ca_Leak_from_ext     | 10     | 10           | (perm)                  | This leak parameter was dependent on other parameters of $\text{Ca}^{2+}$ regulation.                                                                                                                                                                                                                                                                                                                                                                                                            |
| e10 | CaReg | Ca_bind_calreticulin | 0.1    | 200          | 2000                    | Calreticulin is a high-concentration and uncooperative buffer. We took $K_d$ to be 2 mM, according to Krause and Michalak (1997) Cell 88:439-443.                                                                                                                                                                                                                                                                                                                                                |
| f1  | CaBuf | Ca_bind_MgGreen      | 1000   | 19000        | 19                      | Apparent $K_d$ of Magnesium Green 1 for $\text{Ca}^{2+}$ is 19 $\mu\text{M}$ in the presence of endogenous $\text{Mg}^{2+}$ , from Wang <i>et al.</i> (2000) Nat Neurosci 3:1266-1273.                                                                                                                                                                                                                                                                                                           |
| f2  | CaBuf | PV_bind_Ca           | 18.5   | 0.95         | 0.05315                 | Parvalbumin is a slow and high-affinity buffer. Most of the parvalbumin binds endogenous $\text{Mg}^{2+}$ at the basal $\text{Ca}^{2+}$ concentration,. In Lee <i>et al.</i> (2000) J Physiol 525:419-431, they measured the apparent dissociation constant $K_d = 0.0514 \mu\text{M}$ and the unbinding rate constant $k_b = 0.95 /sec$ in the presence of $\text{Mg}^{2+}$ , and we used the parameter values.                                                                                 |
| f3  | CaBuf | CB_bind_2Ca          | 87     | 11.275       | 0.36                    | Calbindin is a cooperative and high-affinity buffer. We took the $K_d$ value and the Hill coefficient to be 0.36 $\mu\text{M}$ and 2, from Maeda <i>et al.</i> (1999) Neuron 24:989-1002. These values were consistent with (2:2) ratio in Table 1 in Nagerl <i>et al.</i> (2000) Biophys J 79:3009-3018.                                                                                                                                                                                        |
| f4  | CaBuf | LAB_bind_Ca          | 10     | 1000         | 100                     | We included low-affinity buffers based on Fig. 6 in Maeda <i>et al.</i> (1999) Neuron 24:989-1002. The Hill coefficients of low-affinity buffer 1 (LAB) and low-affinity                                                                                                                                                                                                                                                                                                                         |
| f5  | CaBuf | LAB2_bind_2Ca        | 1      | 4000         | 20                      | buffer 2 (LAB2) were taken 1 and 2, respectively.                                                                                                                                                                                                                                                                                                                                                                                                                                                |

**Supplemental Table 3: Categories of parameters**

|                                                                 | known                                                                                                                                                              |                                                                                                                                        |                                                                                  |                                                    | unknown                                                                                                              |
|-----------------------------------------------------------------|--------------------------------------------------------------------------------------------------------------------------------------------------------------------|----------------------------------------------------------------------------------------------------------------------------------------|----------------------------------------------------------------------------------|----------------------------------------------------|----------------------------------------------------------------------------------------------------------------------|
|                                                                 | Form Purkinje cells                                                                                                                                                | From other cells                                                                                                                       | From reaction in test tubes                                                      | From other molecular subtypes                      |                                                                                                                      |
| Time constants, $\tau$                                          |                                                                                                                                                                    | f2, f3                                                                                                                                 | a6, a8,<br>e1, e4 ,e9                                                            |                                                    | a1, a2, a3, a4, b1, b2, b3,<br>b4, b5, b8, b9, c1, c2, c4,<br>d1, d2, d3, d4, d5, d6,<br>e2, e5, e7, e10, f1, f4, f5 |
| Dissociation constants, $K_d$<br>and Michaelis constants, $K_m$ | d1, d2, d3, d4, d5,d6                                                                                                                                              | a1, a2, a4,<br>f1, f2, f3                                                                                                              | b4, b5, c1, c2, c4,<br>e2, e5, e7, e10                                           | b1, b2, b3,<br>b8, b9                              | a3, f4 ,f5                                                                                                           |
| Enzyme turnovers, $V_{max}$                                     |                                                                                                                                                                    | b10, b11,<br>b12                                                                                                                       | a7, c5, e3, e6, e8                                                               | b7                                                 | a5, b6, c3                                                                                                           |
| Initial concentrations, [ ]                                     | [Ca <sup>2+</sup> ] <sub>i</sub> , IP <sub>3</sub> R,<br>MgGreen,<br>parvalbumin,<br>calbindin-D <sub>28k</sub> ,<br>low-affinity buffer,<br>low-affinity buffer 2 | Glu,<br>mGluR, Gq,<br>IP <sub>3</sub> ,<br>[Ca <sup>2+</sup> ] <sub>ER</sub> ,<br>[Ca <sup>2+</sup> ] <sub>ext</sub> ,<br>calreticulin | PIP <sub>2</sub> ,<br>IP <sub>3</sub> 3-kinase,<br>IP <sub>3</sub> 5-phosphatase | PLC $\beta$ 4<br><br>(taken from<br>PLC $\beta$ 1) | SERCA,<br>PMCA,<br>Na <sup>+</sup> /Ca <sup>2+</sup>                                                                 |

## Supplemental Figure 2:

### Analysis of parameter sensitivity to the IP<sub>3</sub> time course and time window function.

We investigated the sensitivity of our model to variations of all known and unknown parameters (total of 96 parameters). All parameter values listed in Supplemental Tables 1, 2 were given as explained in Methods and notes in the Supplemental Tables (the default parameter value set).

*A-E*, Parameter sensitivity to the IP<sub>3</sub> time course. Each value of the known and unknown parameters was varied in a range of 1/100—100 times while maintaining the values of all other parameters, and the IP<sub>3</sub> time course with PF-alone input was re-computed. *A*, An example of re-computed IP<sub>3</sub> time course. The maximum enzyme velocity for Gq activation by Glu-mGluR was varied to 2, 5, 10, 20, 50, and 100 (red and bold lines) and 1/2, 1/5, 1/10, 1/20, 1/50, and 1/100 times (pink and broken lines). *B-E*, The peak time and peak amplitude of IP<sub>3</sub> time course when we varied the values of time constants (*B*), dissociation and Michaelis constants (*C*), maximum enzyme velocities (*D*), and initial molecular concentrations (*E*).

*F-K*, Parameter sensitivity to the time window of Ca<sup>2+</sup> response. Each value of the known and unknown parameters was varied in a range of 1/100—100 times while maintaining the values of all other parameters, and the time window function was re-computed as well as the IP<sub>3</sub> time course. *F*, An example of re-computed time window. The time constant for binding Glu and mGluR was varied to 2, 5, 10, 20, 50, and 100 (red and bold lines) and 1/2, 1/5, 1/10, 1/20, 1/50, and 1/100 times (pink and broken lines). *G*, For quantitative comparisons, we used three features: the peak time, half-width, and peak amplitude of the Gaussian function fitted to the time window. The time windows were analyzed in the time interval from -500 to 600 ms. *H-K*, The three features of time window when we varied the values of time constants (*H*), dissociation and Michaelis constants (*I*), maximum enzyme velocities (*J*), and initial molecular concentrations (*K*).

The shapes of the symbols indicate the magnitude of varying the parameter values (○: 1/2 or 2; △: 1/5 or 5; ▽: 1/10 or 10; □: 1/20 or 20; ◇: 1/50 or 50; ☆: 1/100 or 100). The colors of the symbols indicate the direction of varying the parameter value (light color: decrease; dark color: increase) and whether the parameter is known or unknown (blue: known; red: unknown). When the symbols of one parameter gather together on the dashed line (control), the IP<sub>3</sub> time course and time window are robust against variations of the parameter value.

# Supplemental Figure 2A

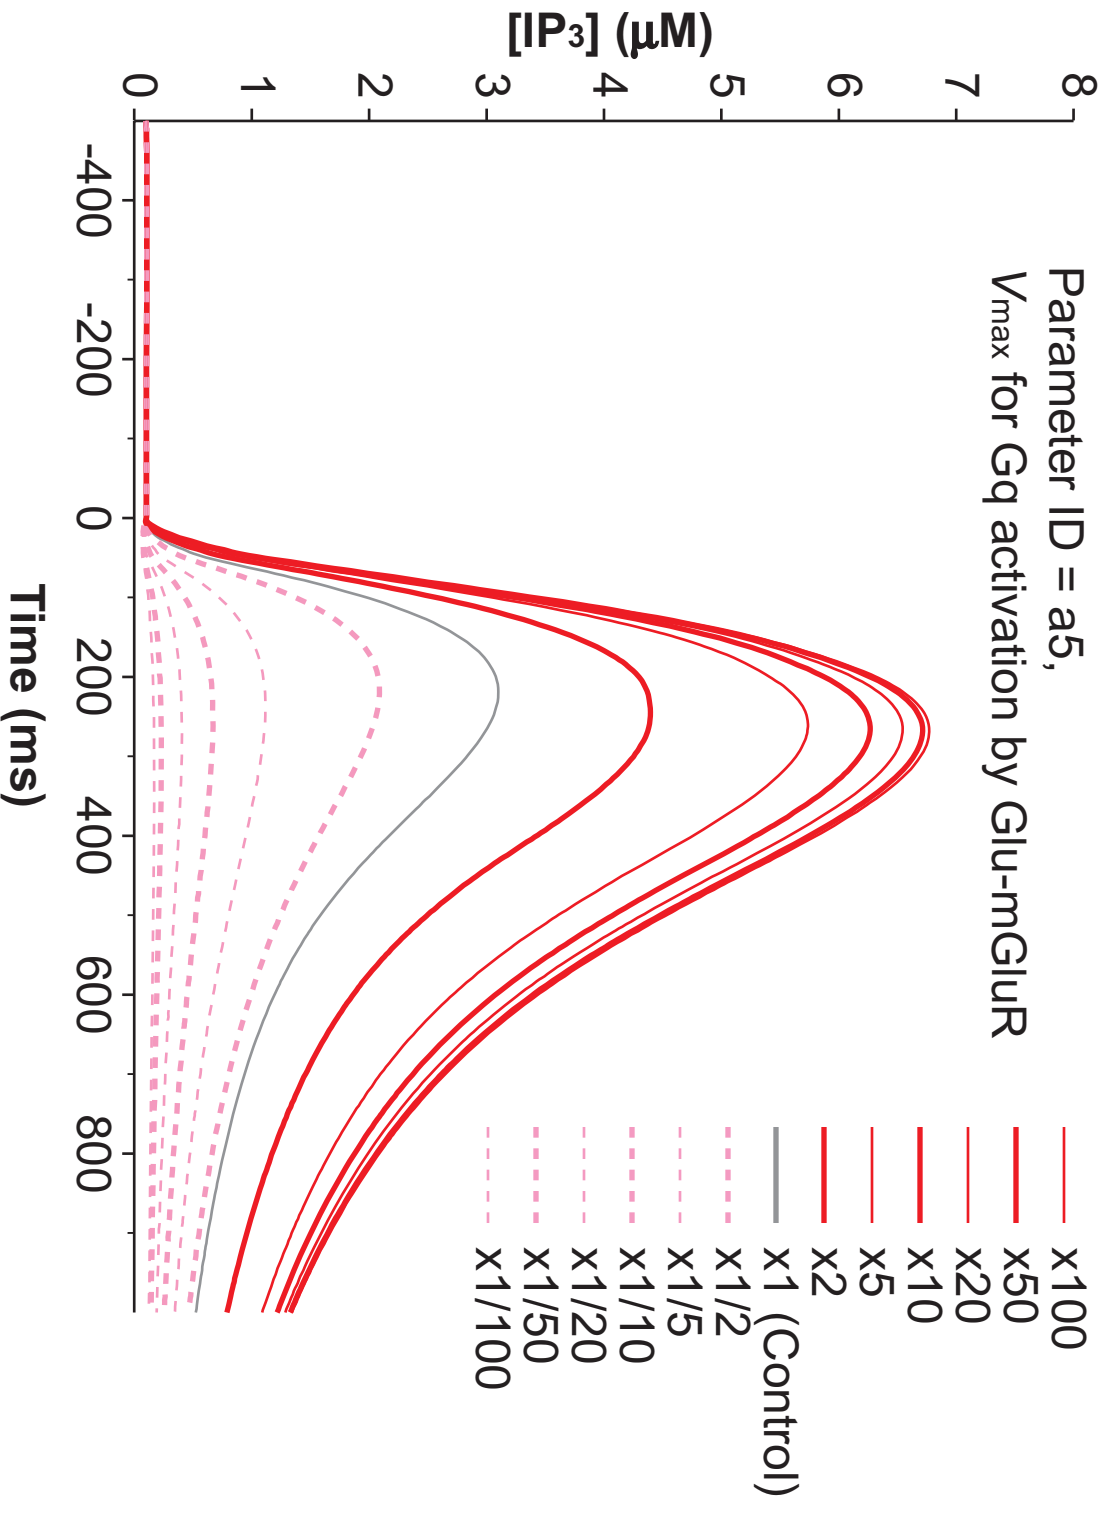

# Supplemental Figure 2B

|         |        |       |       |       |      |      |    |    |     |     |     |      |
|---------|--------|-------|-------|-------|------|------|----|----|-----|-----|-----|------|
|         | x1/100 | x1/50 | x1/20 | x1/10 | x1/5 | x1/2 | x2 | x5 | x10 | x20 | x50 | x100 |
| known   | ★      | ◇     | □     | ▽     | △    | ○    | ○  | △  | ▽   | □   | ◇   | ★    |
| unknown | ☆      | ◇     | □     | ▽     | △    | ○    | ○  | △  | ▽   | □   | ◇   | ★    |

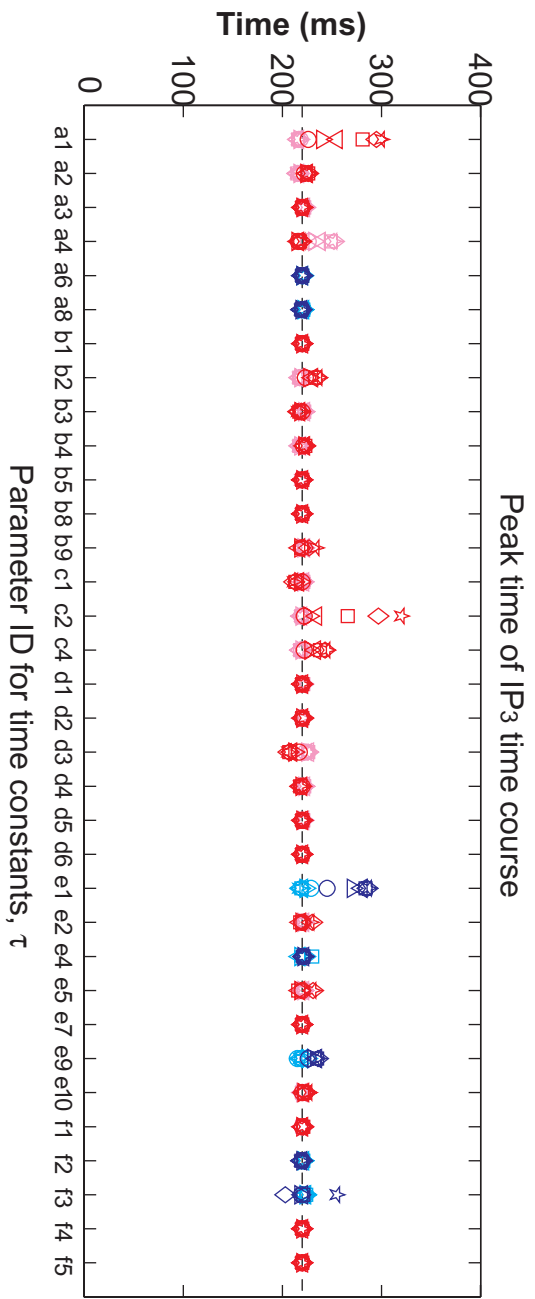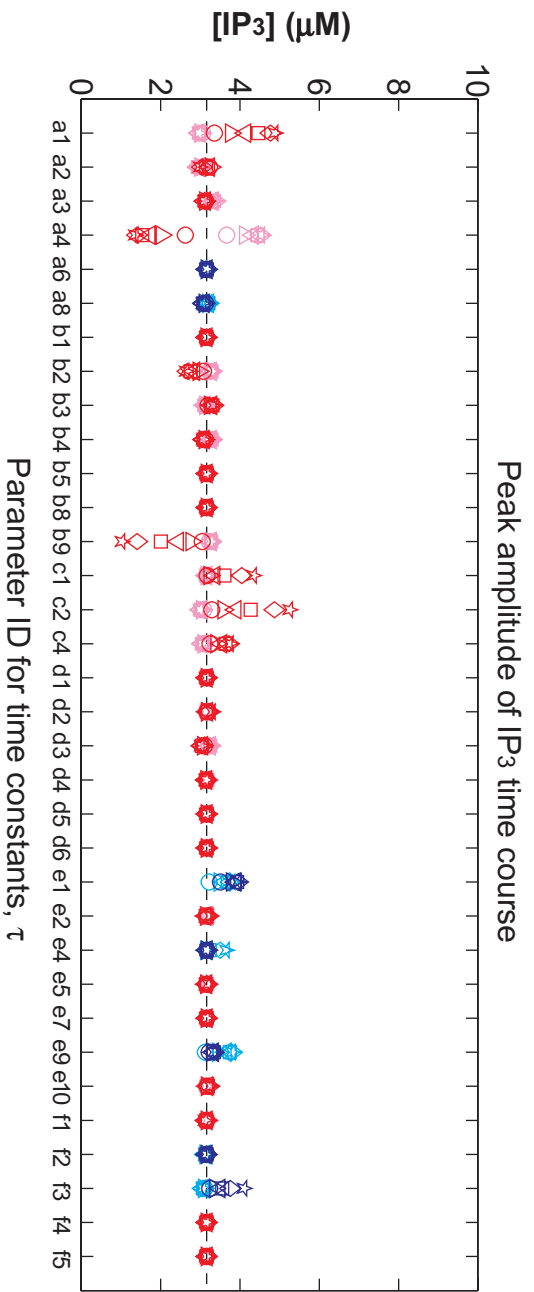

# Supplemental Figure 2C

|         |        |       |       |       |      |      |    |    |     |     |     |      |
|---------|--------|-------|-------|-------|------|------|----|----|-----|-----|-----|------|
|         | x1/100 | x1/50 | x1/20 | x1/10 | x1/5 | x1/2 | x2 | x5 | x10 | x20 | x50 | x100 |
| known   | ★      | ◇     | □     | ▽     | △    | ○    | ○  | △  | ▽   | □   | ◇   | ★    |
| unknown | ★      | ◇     | □     | ▽     | △    | ○    | ○  | △  | ▽   | □   | ◇   | ★    |

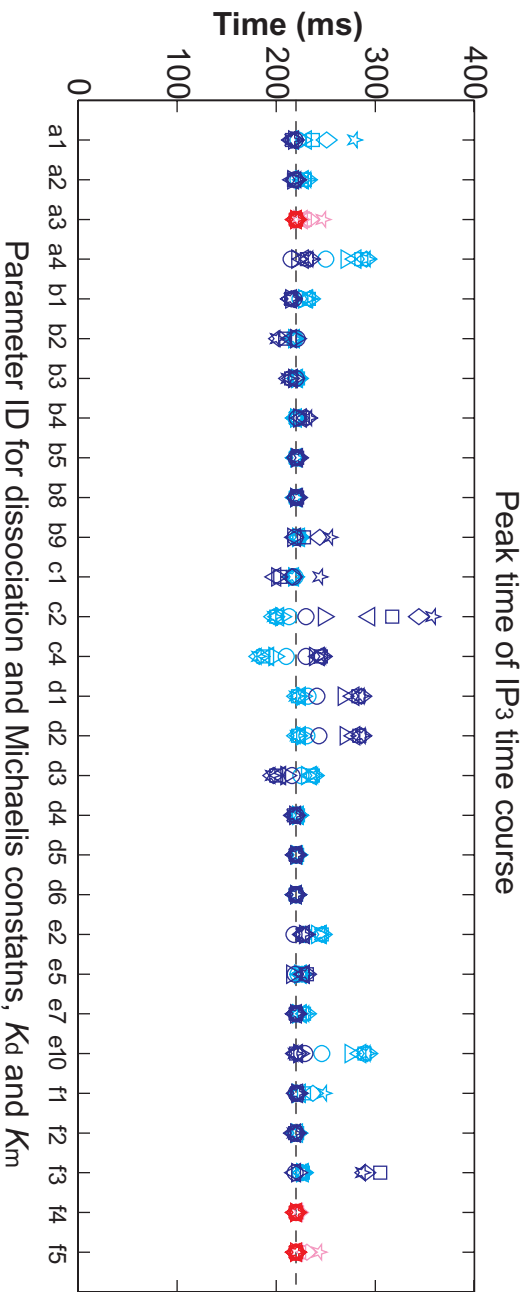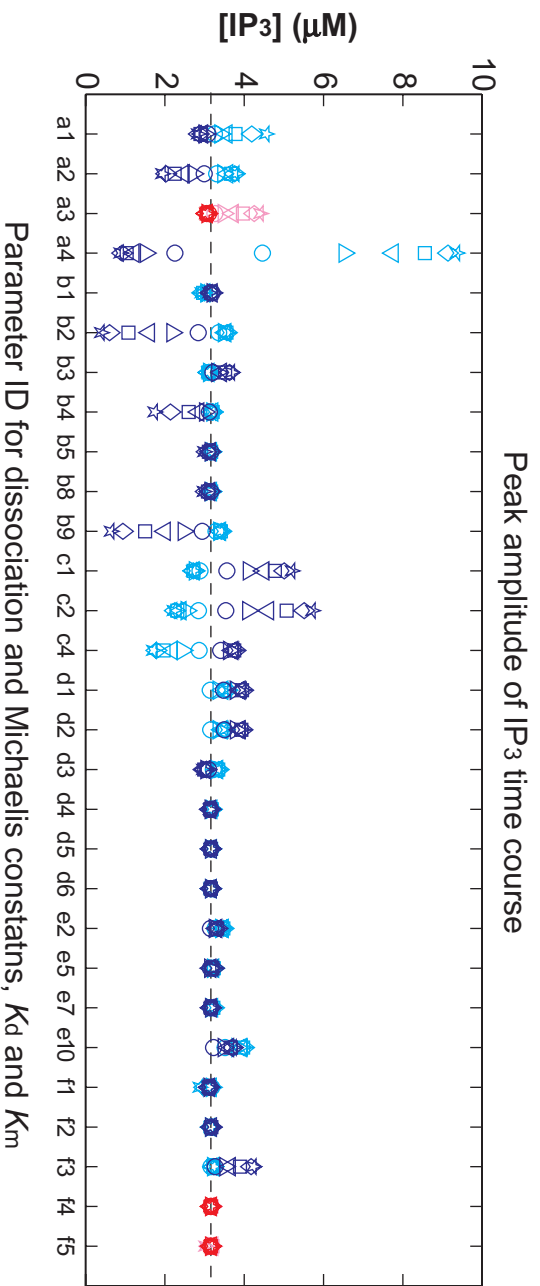



# Supplemental Figure 2D

|         | x1/100 | x1/50 | x1/20 | x1/10 | x1/5 | x1/2 | x2 | x5 | x10 | x20 | x50 | x100 |
|---------|--------|-------|-------|-------|------|------|----|----|-----|-----|-----|------|
| known   | ★      | ◇     | □     | ▽     | △    | ○    | ○  | △  | ▽   | □   | ◇   | ★    |
| unknown | ★      | ◇     | □     | ▽     | △    | ○    | ○  | △  | ▽   | □   | ◇   | ★    |

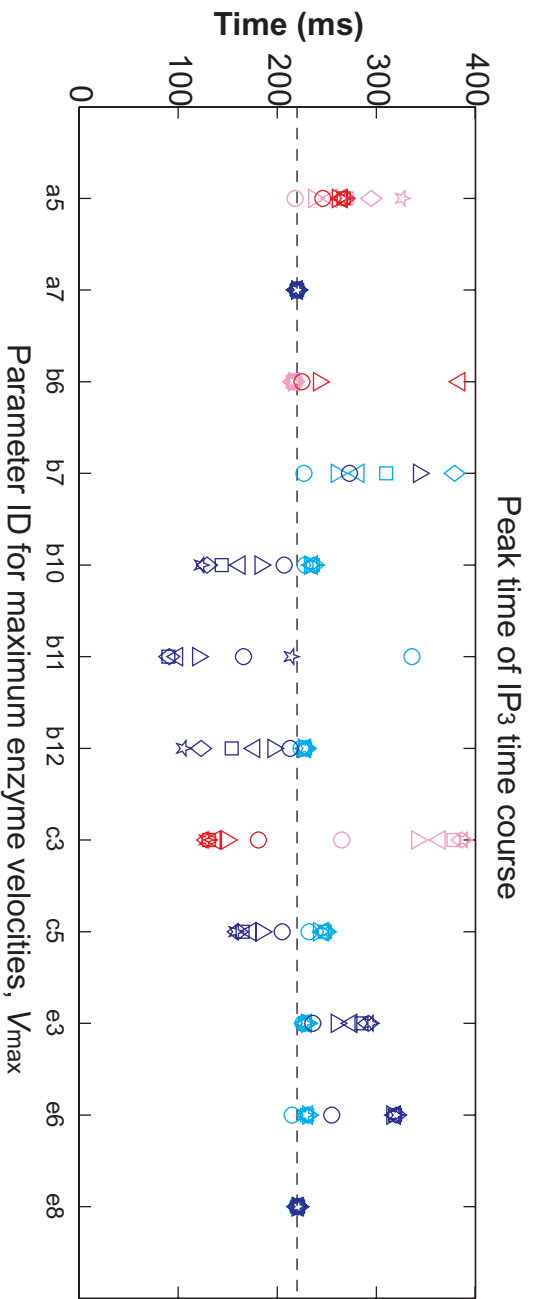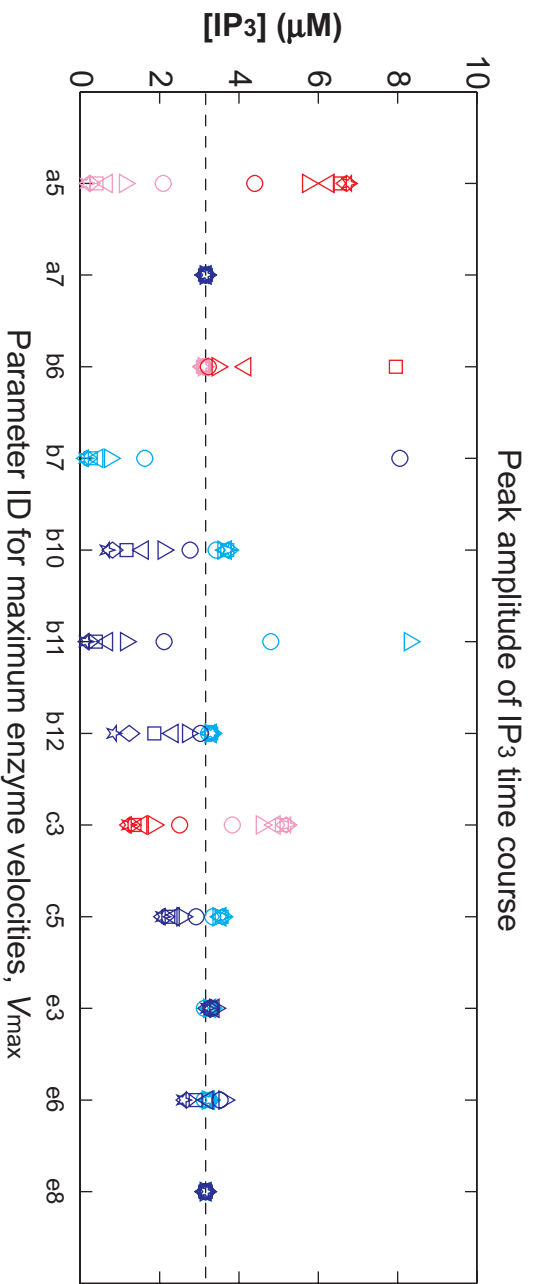

# Supplemental Figure 2E

|         | x1/100 | x1/50 | x1/20 | x1/10 | x1/5 | x1/2 | x2 | x5 | x10 | x20 | x50 | x100 |
|---------|--------|-------|-------|-------|------|------|----|----|-----|-----|-----|------|
| known   |        |       |       |       |      |      |    |    |     |     |     |      |
| unknown |        |       |       |       |      |      |    |    |     |     |     |      |

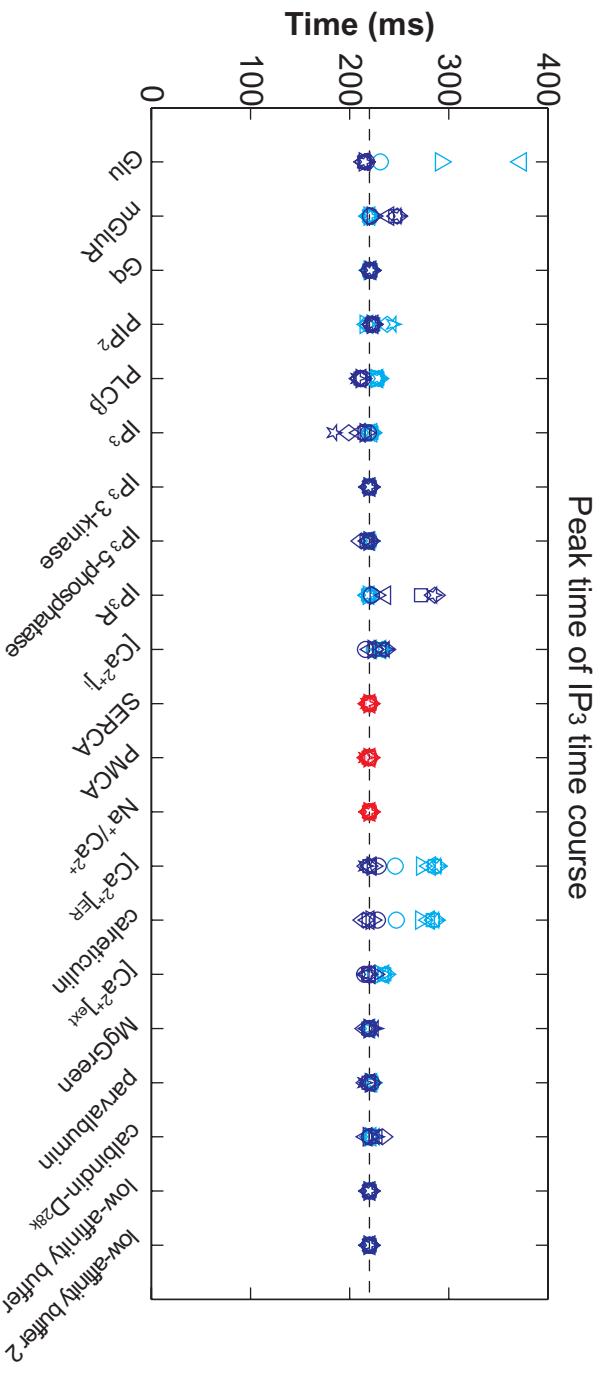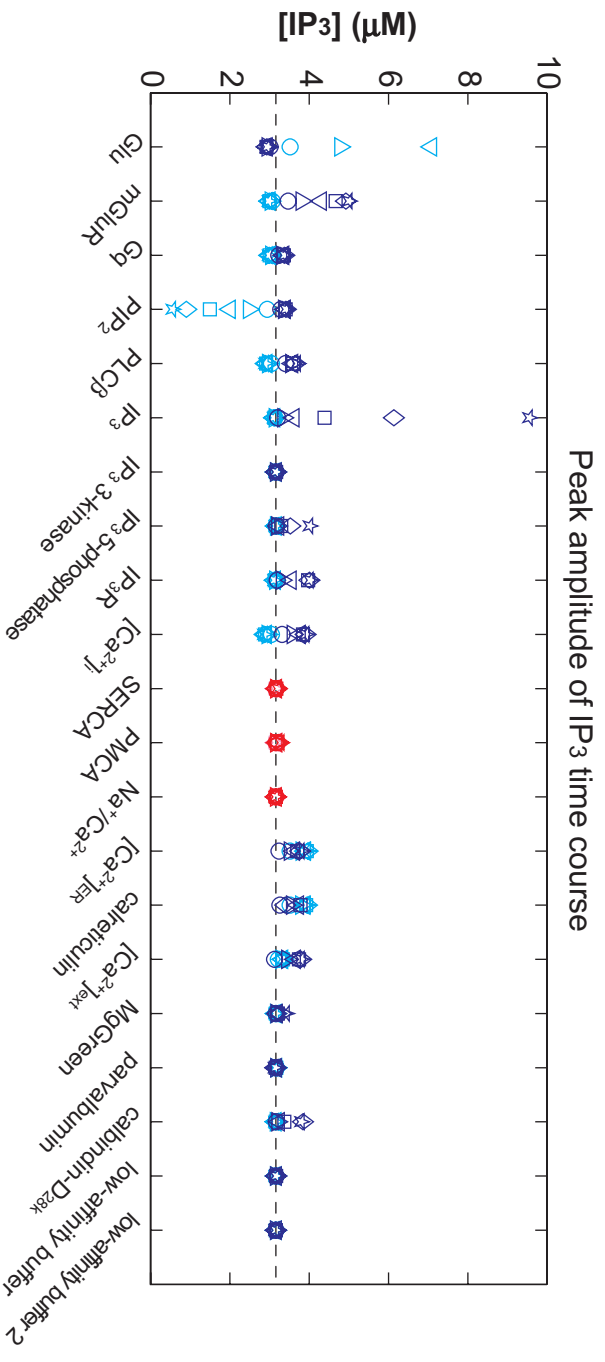

# Supplemental Figure 2F

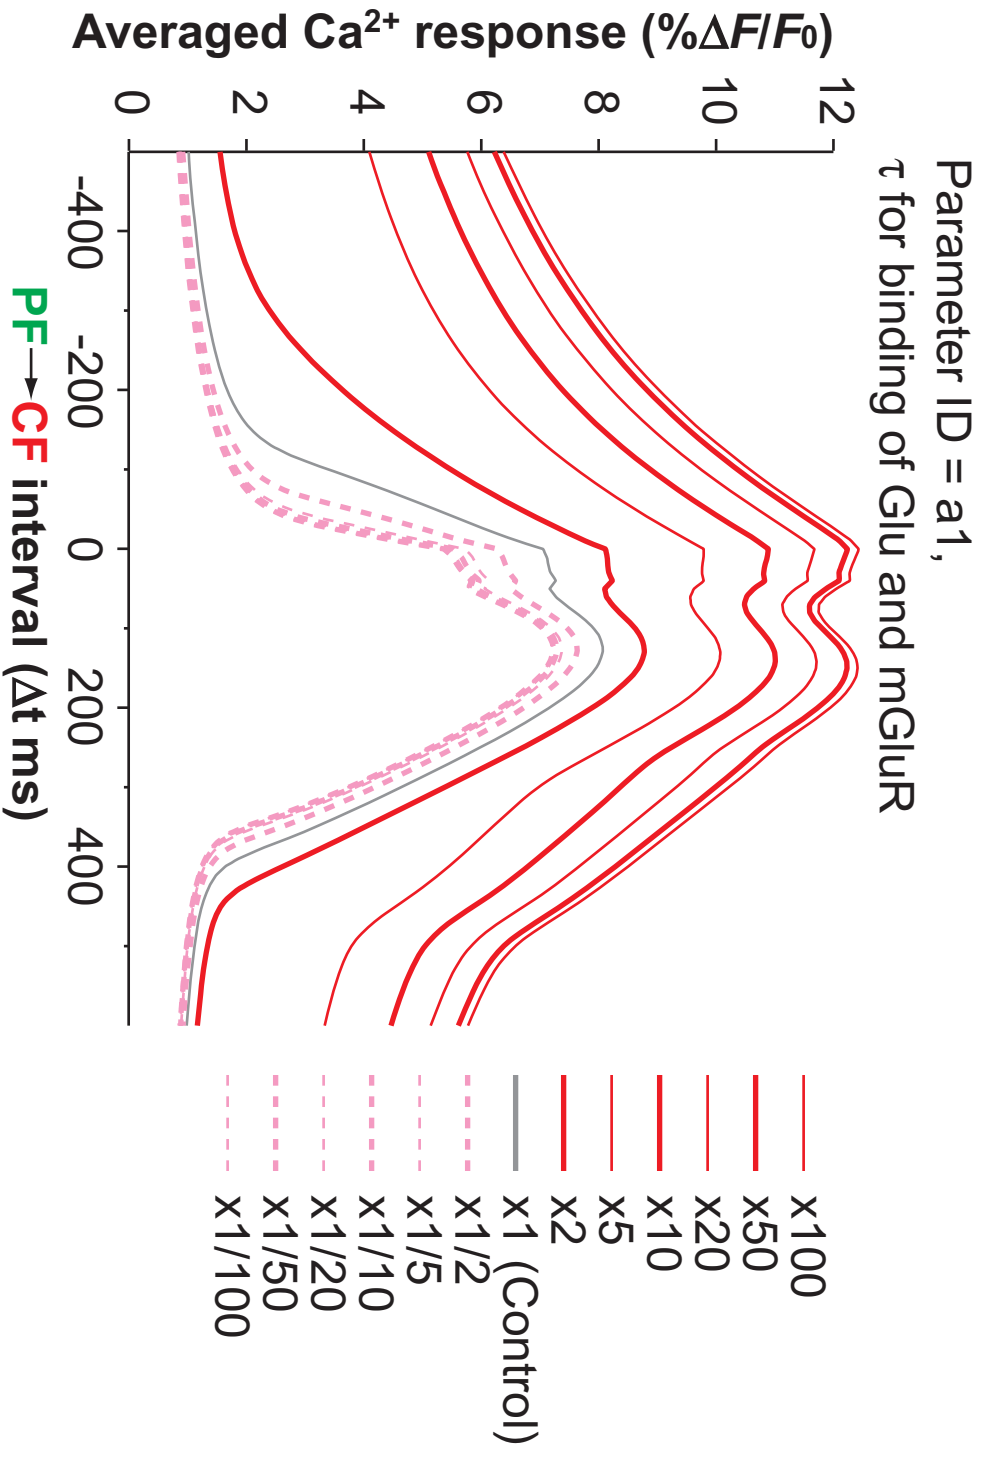

# Supplemental Figure 2G

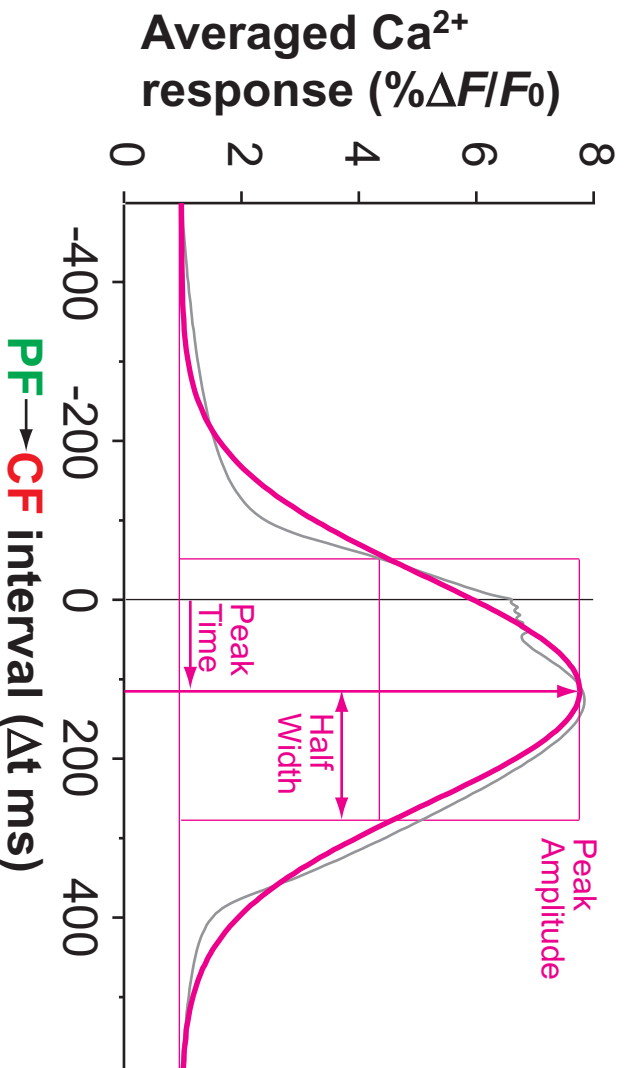

# Supplemental Figure 2H

|         |        |       |       |       |      |      |    |    |     |     |     |      |
|---------|--------|-------|-------|-------|------|------|----|----|-----|-----|-----|------|
|         | x1/100 | x1/50 | x1/20 | x1/10 | x1/5 | x1/2 | x2 | x5 | x10 | x20 | x50 | x100 |
| known   | ★      | ◇     | □     | ▽     | △    | ○    | ○  | △  | ▽   | □   | ◇   | ★    |
| unknown | ★      | ◇     | □     | ▽     | △    | ○    | ○  | △  | ▽   | □   | ◇   | ★    |

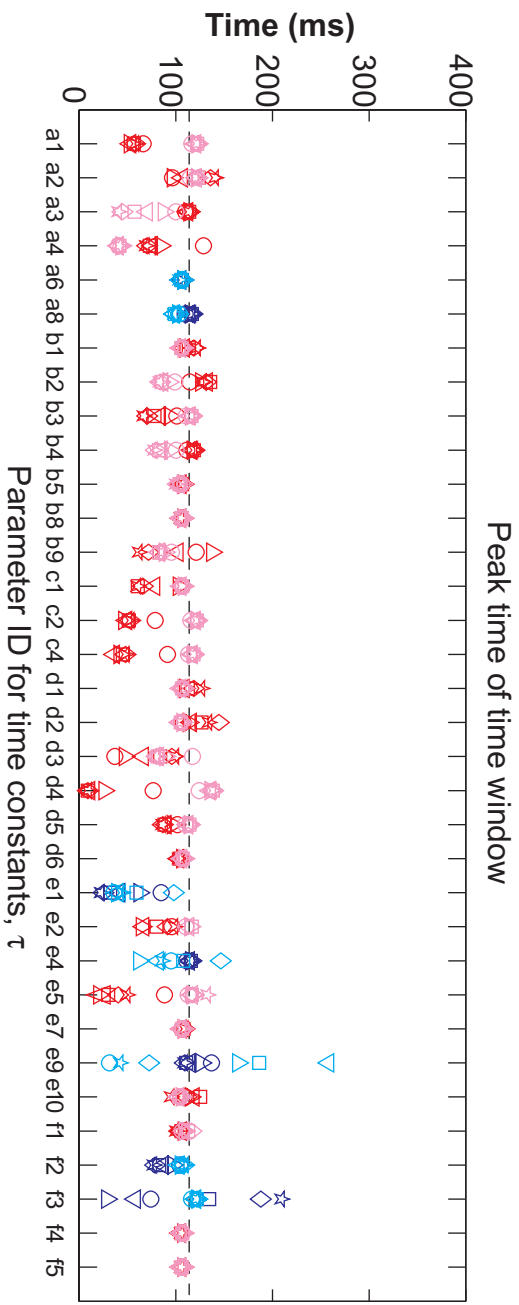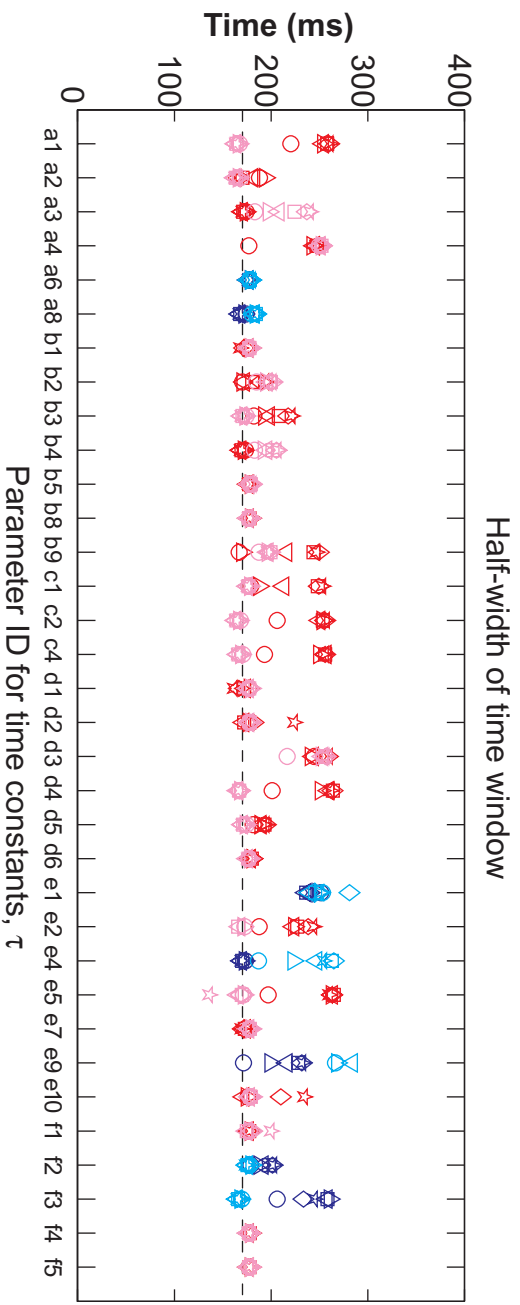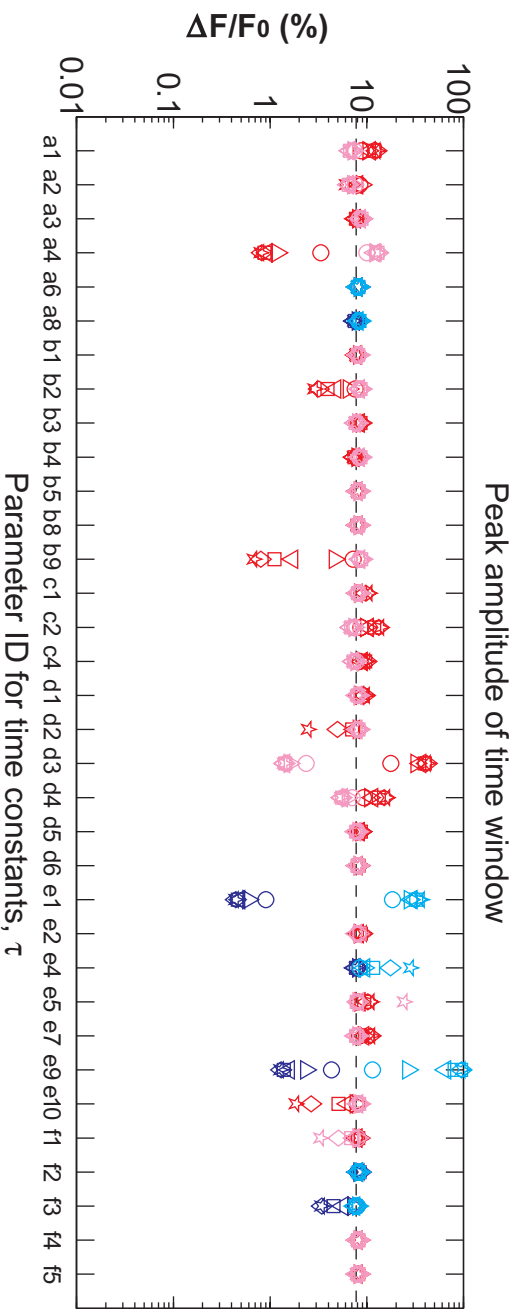

# Supplemental

## Figure 21

|         |        |       |       |       |      |      |    |    |     |     |     |      |
|---------|--------|-------|-------|-------|------|------|----|----|-----|-----|-----|------|
|         | x1/100 | x1/50 | x1/20 | x1/10 | x1/5 | x1/2 | x2 | x5 | x10 | x20 | x50 | x100 |
| known   | ★      | ◇     | □     | ▽     | △    | ○    | ○  | △  | ▽   | □   | ◇   | ★    |
| unknown | ★      | ◇     | □     | ▽     | △    | ○    | ○  | △  | ▽   | □   | ◇   | ★    |

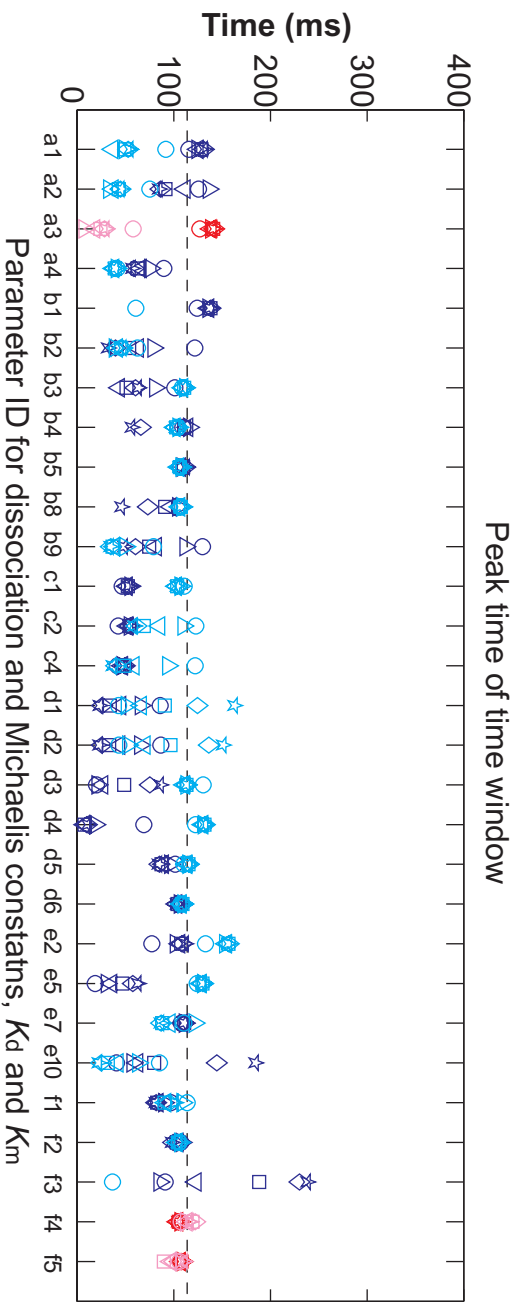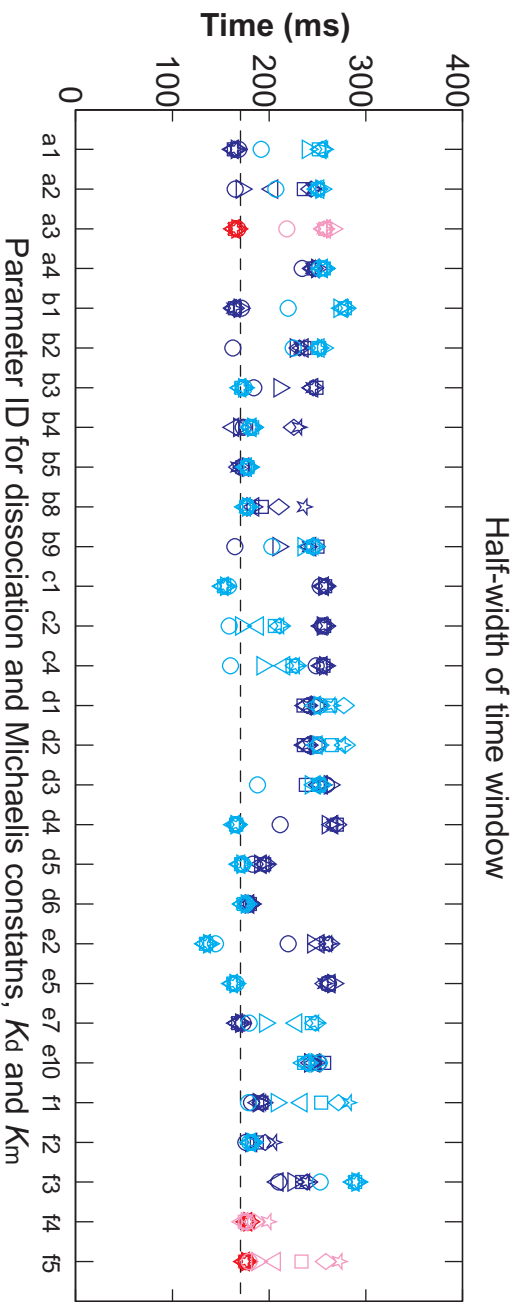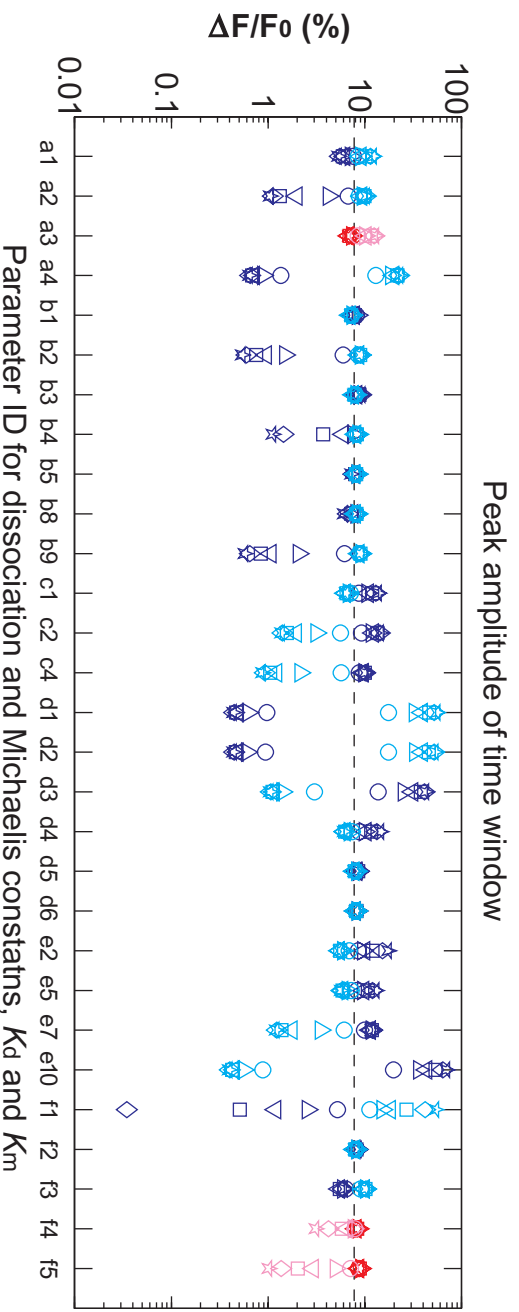

# Supplemental

## Figure 2J

|         |        |       |       |       |      |      |    |    |     |     |     |      |
|---------|--------|-------|-------|-------|------|------|----|----|-----|-----|-----|------|
|         | x1/100 | x1/50 | x1/20 | x1/10 | x1/5 | x1/2 | x2 | x5 | x10 | x20 | x50 | x100 |
| known   | ★      | ◇     | □     | ▽     | △    | ○    | ○  | △  | ▽   | □   | ◇   | ★    |
| unknown | ☆      | ◇     | □     | ▽     | △    | ○    | ○  | △  | ▽   | □   | ◇   | ★    |

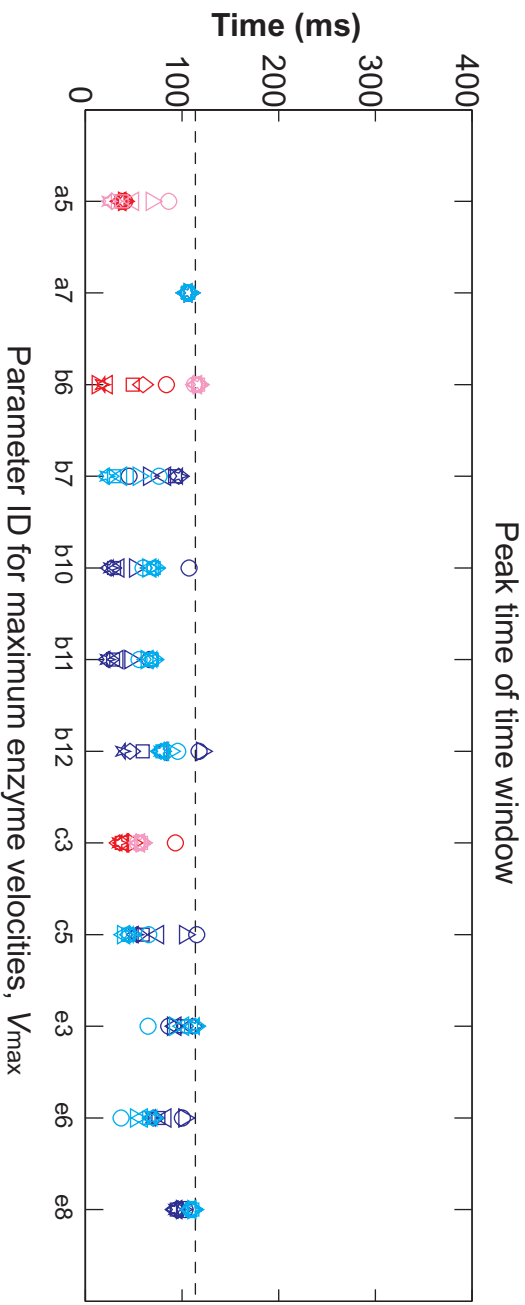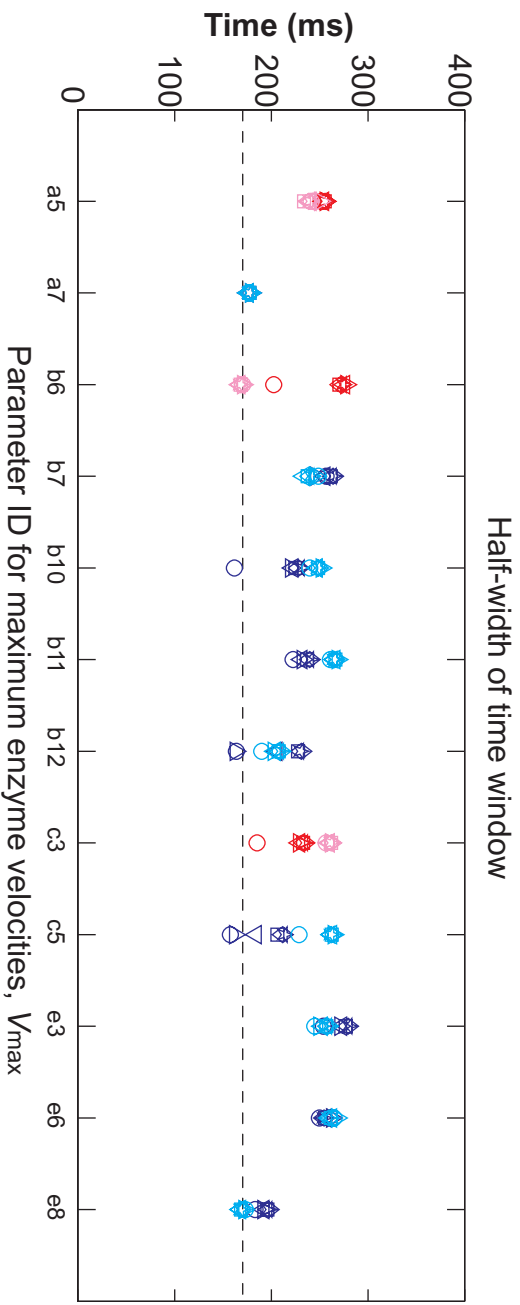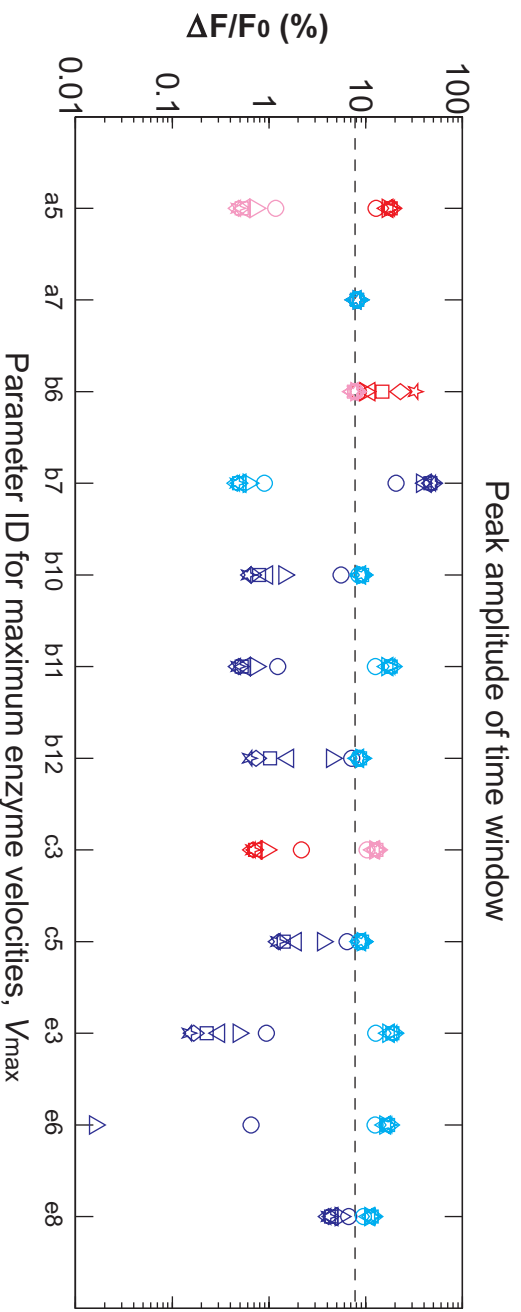

# Supplemental Figure 2K

|         |        |       |       |       |      |      |    |    |     |     |     |      |
|---------|--------|-------|-------|-------|------|------|----|----|-----|-----|-----|------|
|         | x1/100 | x1/50 | x1/20 | x1/10 | x1/5 | x1/2 | x2 | x5 | x10 | x20 | x50 | x100 |
| known   | ★      | ◇     | □     | ▽     | △    | ○    | ○  | △  | ▽   | □   | ◇   | ★    |
| unknown | ★      | ◇     | □     | ▽     | △    | ○    | ○  | △  | ▽   | □   | ◇   | ★    |

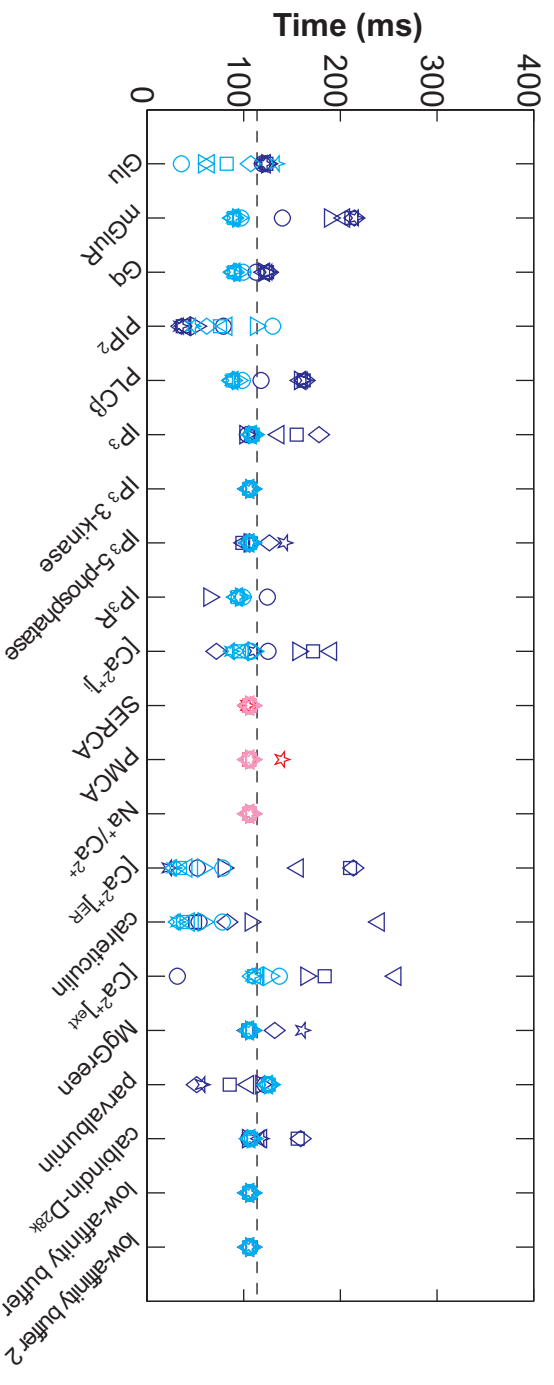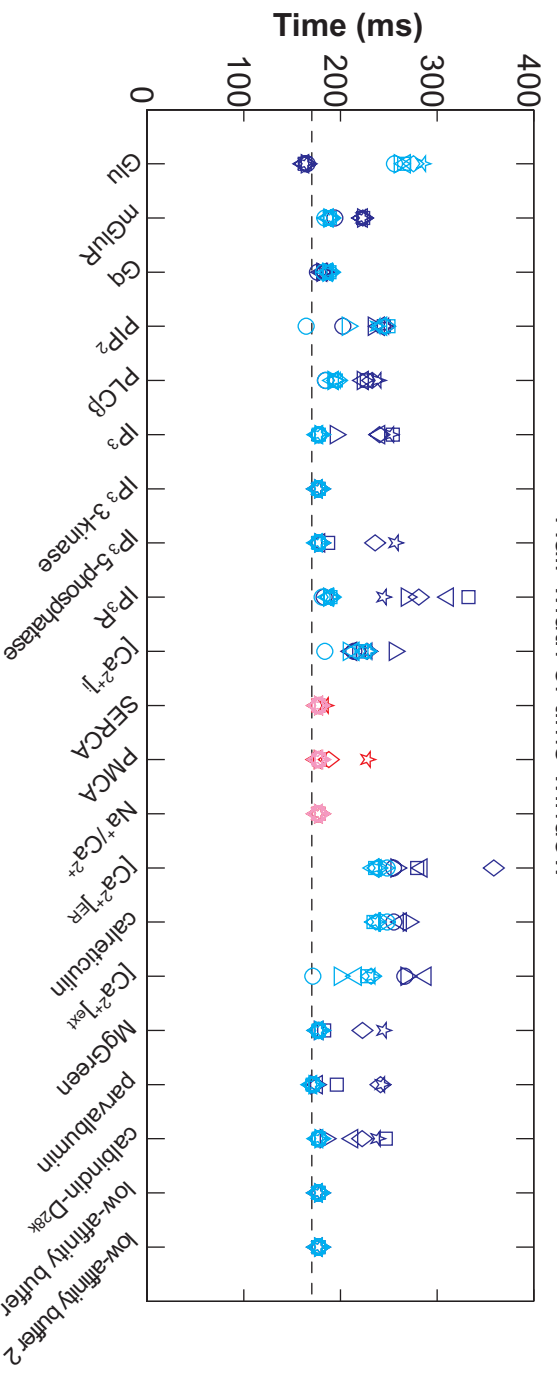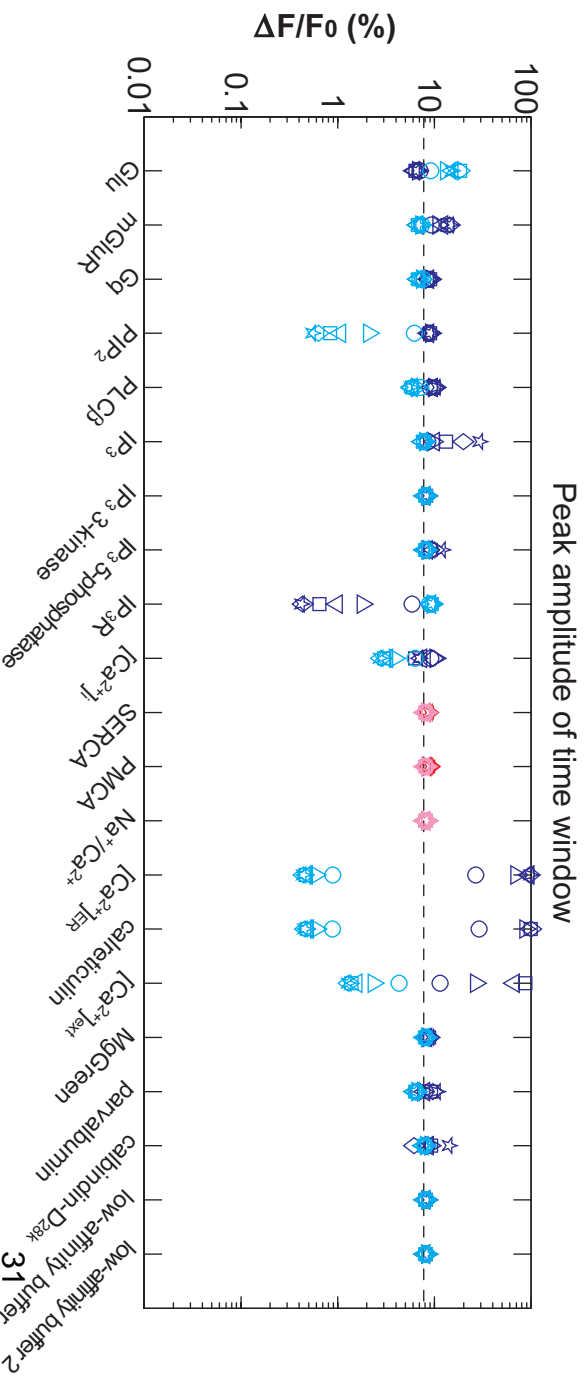

Supplement: SuppAllRaw.pdf [file SuppAllRaw.pdf]
